# Supplementary material for: Multicenter randomized phase II trial of atezolizumab with or without cobimetinib in biliary tract cancers
Source: JCI journal article supplement (doi:10.1172/jci152670), 2021-12-14
Supplement: sd2 [file 2]

## ICMJE DISCLOSURE FORM

**Date:** August 29, 2021

**Your Name:** Mark Yarchoan

**Manuscript Title:** Multicenter randomized phase 2 trial of atezolizumab with or without cobimetinib in biliary tract cancers (BTCs)

**Manuscript number (if known):** 152670-JCI-CMED-1

In the interest of transparency, we ask you to disclose all relationships/activities/interests listed below that are related to the content of your manuscript. "Related" means any relation with for-profit or not-for-profit third parties whose interests may be affected by the content of the manuscript. Disclosure represents a commitment to transparency and does not necessarily indicate a bias. If you are in doubt about whether to list a relationship/activity/interest, it is preferable that you do so.

The following questions apply to the author's relationships/activities/interests as they relate to the current manuscript only.

The author's relationships/activities/interests should be defined broadly. For example, if your manuscript pertains to the epidemiology of hypertension, you should declare all relationships with manufacturers of antihypertensive medication, even if that medication is not mentioned in the manuscript.

In item #1 below, report all support for the work reported in this manuscript without time limit. For all other items, the time frame for disclosure is the past 36 months.

|                                                           |                                                                                                                                                                                | Name all entities with whom you have this relationship or indicate none (add rows as needed) | Specifications/Comments (e.g., if payments were made to you or to your institution) |
|-----------------------------------------------------------|--------------------------------------------------------------------------------------------------------------------------------------------------------------------------------|----------------------------------------------------------------------------------------------|-------------------------------------------------------------------------------------|
| <b>Time frame: Since the initial planning of the work</b> |                                                                                                                                                                                |                                                                                              |                                                                                     |
| 1                                                         | All support for the present manuscript (e.g., funding, provision of study materials, medical writing, article processing charges, etc.)<br><b>No time limit for this item.</b> | X None                                                                                       |                                                                                     |
|                                                           |                                                                                                                                                                                |                                                                                              |                                                                                     |
|                                                           |                                                                                                                                                                                |                                                                                              |                                                                                     |
|                                                           |                                                                                                                                                                                |                                                                                              |                                                                                     |
|                                                           |                                                                                                                                                                                |                                                                                              |                                                                                     |
|                                                           |                                                                                                                                                                                |                                                                                              |                                                                                     |
|                                                           |                                                                                                                                                                                |                                                                                              |                                                                                     |
| <b>Time frame: past 36 months</b>                         |                                                                                                                                                                                |                                                                                              |                                                                                     |
| 2                                                         | Grants or contracts from any entity (if not indicated in item #1 above).                                                                                                       | None                                                                                         |                                                                                     |
|                                                           |                                                                                                                                                                                | Bristol-Myers Squibb                                                                         | To Johns Hopkins                                                                    |
|                                                           |                                                                                                                                                                                | Exelixis                                                                                     | To Johns Hopkins                                                                    |
|                                                           |                                                                                                                                                                                | Genentech/Roche                                                                              | To Johns Hopkins                                                                    |
|                                                           |                                                                                                                                                                                | Incyte                                                                                       | To Johns Hopkins                                                                    |
| 3                                                         | Royalties or licenses                                                                                                                                                          | X None                                                                                       |                                                                                     |

|    |                                                                                                              |                 |  |
|----|--------------------------------------------------------------------------------------------------------------|-----------------|--|
|    |                                                                                                              |                 |  |
|    |                                                                                                              |                 |  |
|    |                                                                                                              |                 |  |
| 4  | Consulting fees                                                                                              | X None          |  |
|    |                                                                                                              |                 |  |
|    |                                                                                                              |                 |  |
| 5  | Payment or honoraria for lectures, presentations, speakers bureaus, manuscript writing or educational events | X None          |  |
|    |                                                                                                              |                 |  |
|    |                                                                                                              |                 |  |
| 6  | Payment for expert testimony                                                                                 | X None          |  |
|    |                                                                                                              |                 |  |
|    |                                                                                                              |                 |  |
| 7  | Support for attending meetings and/or travel                                                                 | X None          |  |
|    |                                                                                                              |                 |  |
|    |                                                                                                              |                 |  |
| 8  | Patents planned, issued or pending                                                                           | X None          |  |
|    |                                                                                                              |                 |  |
|    |                                                                                                              |                 |  |
| 9  | Participation on a Data Safety Monitoring Board or Advisory Board                                            | ___ None        |  |
|    |                                                                                                              | Eisai           |  |
|    |                                                                                                              | Exelixis        |  |
|    |                                                                                                              | AstraZeneca     |  |
|    |                                                                                                              | Genentech/Roche |  |
|    |                                                                                                              | Geneos          |  |
| 10 | Leadership or fiduciary role in other board, society, committee or advocacy group, paid or unpaid            | X None          |  |
|    |                                                                                                              |                 |  |
|    |                                                                                                              |                 |  |
| 11 | Stock or stock options                                                                                       | X None          |  |
|    |                                                                                                              |                 |  |
|    |                                                                                                              |                 |  |
| 12 | Receipt of equipment, materials, drugs, medical writing, gifts or other services                             | X None          |  |
|    |                                                                                                              |                 |  |
|    |                                                                                                              |                 |  |
| 13 | Other financial or non-financial interests                                                                   | ___ None        |  |
|    |                                                                                                              |                 |  |
|    |                                                                                                              |                 |  |

Please place an "X" next to the following statement to indicate your agreement:

**X I certify that I have answered every question and have not altered the wording of any of the questions on this form.**

# ICMJE DISCLOSURE FORM

Date: August 30, 2021  
 Your Name: Nilo Azad, M.D.  
 Manuscript Title: Multicenter randomized phase 2 trial of atezolizumab with or without cobimetinib in biliary tract cancers (BTCs)  
 Manuscript number (if known): 152670-JCI-CMED-1

In the interest of transparency, we ask you to disclose all relationships/activities/interests listed below that are related to the content of your manuscript. "Related" means any relation with for-profit or not-for-profit third parties whose interests may be affected by the content of the manuscript. Disclosure represents a commitment to transparency and does not necessarily indicate a bias. If you are in doubt about whether to list a relationship/activity/interest, it is preferable that you do so.

The following questions apply to the author's relationships/activities/interests as they relate to the current manuscript only.

The author's relationships/activities/interests should be defined broadly. For example, if your manuscript pertains to the epidemiology of hypertension, you should declare all relationships with manufacturers of antihypertensive medication, even if that medication is not mentioned in the manuscript.

In item #1 below, report all support for the work reported in this manuscript without time limit. For all other items, the time frame for disclosure is the past 36 months.

|                                                           |                                                                                                                                                                                | Name all entities with whom you have this relationship or indicate none (add rows as needed)                                                                                    | Specifications/Comments (e.g., if payments were made to you or to your institution) |
|-----------------------------------------------------------|--------------------------------------------------------------------------------------------------------------------------------------------------------------------------------|---------------------------------------------------------------------------------------------------------------------------------------------------------------------------------|-------------------------------------------------------------------------------------|
| <b>Time frame: Since the initial planning of the work</b> |                                                                                                                                                                                |                                                                                                                                                                                 |                                                                                     |
| 1                                                         | All support for the present manuscript (e.g., funding, provision of study materials, medical writing, article processing charges, etc.)<br><b>No time limit for this item.</b> | <input checked="" type="checkbox"/> None                                                                                                                                        |                                                                                     |
|                                                           |                                                                                                                                                                                |                                                                                                                                                                                 |                                                                                     |
|                                                           |                                                                                                                                                                                |                                                                                                                                                                                 |                                                                                     |
|                                                           |                                                                                                                                                                                |                                                                                                                                                                                 |                                                                                     |
|                                                           |                                                                                                                                                                                |                                                                                                                                                                                 |                                                                                     |
|                                                           |                                                                                                                                                                                |                                                                                                                                                                                 |                                                                                     |
|                                                           |                                                                                                                                                                                |                                                                                                                                                                                 |                                                                                     |
| <b>Time frame: past 36 months</b>                         |                                                                                                                                                                                |                                                                                                                                                                                 |                                                                                     |
| 2                                                         | Grants or contracts from any entity (if not indicated in item #1 above).                                                                                                       | <input type="checkbox"/> None<br>Bristol Myer Squibb,<br>Bayer, Atlas, Array, Agios,<br>Celgene, Debio, Ei Lilly and Company, EMD Serono,<br>Incyte, Intensity, Merck,<br>Taiho |                                                                                     |
|                                                           |                                                                                                                                                                                |                                                                                                                                                                                 |                                                                                     |

|    |                                                                                                              |                                                                    |  |
|----|--------------------------------------------------------------------------------------------------------------|--------------------------------------------------------------------|--|
|    |                                                                                                              |                                                                    |  |
| 3  | Royalties or licenses                                                                                        | <input type="checkbox"/> None                                      |  |
|    |                                                                                                              |                                                                    |  |
|    |                                                                                                              |                                                                    |  |
| 4  | Consulting fees                                                                                              | <input type="checkbox"/> Mirati, QED <input type="checkbox"/> None |  |
|    |                                                                                                              |                                                                    |  |
|    |                                                                                                              |                                                                    |  |
| 5  | Payment or honoraria for lectures, presentations, speakers bureaus, manuscript writing or educational events | <input checked="" type="checkbox"/> None                           |  |
|    |                                                                                                              |                                                                    |  |
|    |                                                                                                              |                                                                    |  |
| 6  | Payment for expert testimony                                                                                 | <input type="checkbox"/> None                                      |  |
|    |                                                                                                              |                                                                    |  |
|    |                                                                                                              |                                                                    |  |
| 7  | Support for attending meetings and/or travel                                                                 | <input checked="" type="checkbox"/> None                           |  |
|    |                                                                                                              |                                                                    |  |
|    |                                                                                                              |                                                                    |  |
| 8  | Patents planned, issued or pending                                                                           | <input type="checkbox"/> None                                      |  |
|    |                                                                                                              |                                                                    |  |
|    |                                                                                                              |                                                                    |  |
| 9  | Participation on a Data Safety Monitoring Board or Advisory Board                                            | <input type="checkbox"/> None<br>Incyte, Glaxo Smith Kline, QED    |  |
|    |                                                                                                              |                                                                    |  |
|    |                                                                                                              |                                                                    |  |
| 10 | Leadership or fiduciary role in other board, society, committee or advocacy group, paid or unpaid            | <input type="checkbox"/> None                                      |  |
|    |                                                                                                              |                                                                    |  |
|    |                                                                                                              |                                                                    |  |
| 11 | Stock or stock options                                                                                       | <input type="checkbox"/> None                                      |  |
|    |                                                                                                              |                                                                    |  |
|    |                                                                                                              |                                                                    |  |
| 12 | Receipt of equipment, materials, drugs, medical writing, gifts or other services                             | <input type="checkbox"/> None                                      |  |
|    |                                                                                                              |                                                                    |  |
|    |                                                                                                              |                                                                    |  |
| 13 | Other financial or non-financial interests                                                                   | <input type="checkbox"/> None                                      |  |
|    |                                                                                                              |                                                                    |  |
|    |                                                                                                              |                                                                    |  |

Please place an "X" next to the following statement to indicate your agreement:

X\_\_\_ I certify that I have answered every question and have not altered the wording of any of the questions on this form.

# ICMJE DISCLOSURE FORM

Date: 8/30/2021

Your Name: Subir Goyal

Manuscript Title: Multicenter randomized phase 2 trial of atezolizumab with or without cobimetinib in biliary tract cancers (BTCs)

Manuscript number (if known): 152670-JCI-CMED-1

In the interest of transparency, we ask you to disclose all relationships/activities/interests listed below that are related to the content of your manuscript. "Related" means any relation with for-profit or not-for-profit third parties whose interests may be affected by the content of the manuscript. Disclosure represents a commitment to transparency and does not necessarily indicate a bias. If you are in doubt about whether to list a relationship/activity/interest, it is preferable that you do so.

The following questions apply to the author's relationships/activities/interests as they relate to the current manuscript only.

The author's relationships/activities/interests should be defined broadly. For example, if your manuscript pertains to the epidemiology of hypertension, you should declare all relationships with manufacturers of antihypertensive medication, even if that medication is not mentioned in the manuscript.

In item #1 below, report all support for the work reported in this manuscript without time limit. For all other items, the time frame for disclosure is the past 36 months.

|                                                           |                                                                                                                                                                                | Name all entities with whom you have this relationship or indicate none (add rows as needed)                                                                                                | Specifications/Comments (e.g., if payments were made to you or to your institution) |
|-----------------------------------------------------------|--------------------------------------------------------------------------------------------------------------------------------------------------------------------------------|---------------------------------------------------------------------------------------------------------------------------------------------------------------------------------------------|-------------------------------------------------------------------------------------|
| <b>Time frame: Since the initial planning of the work</b> |                                                                                                                                                                                |                                                                                                                                                                                             |                                                                                     |
| 1                                                         | All support for the present manuscript (e.g., funding, provision of study materials, medical writing, article processing charges, etc.)<br><b>No time limit for this item.</b> | Research reported in this publication was supported in part by the Biostatistics Shared Resource of Winship Cancer Institute of Emory University and NIH/NCI under award number P30CA138292 | Payments were made to Winship Cancer Institute                                      |
|                                                           |                                                                                                                                                                                |                                                                                                                                                                                             |                                                                                     |
|                                                           |                                                                                                                                                                                |                                                                                                                                                                                             |                                                                                     |
|                                                           |                                                                                                                                                                                |                                                                                                                                                                                             |                                                                                     |
|                                                           |                                                                                                                                                                                |                                                                                                                                                                                             |                                                                                     |
|                                                           |                                                                                                                                                                                |                                                                                                                                                                                             |                                                                                     |
|                                                           |                                                                                                                                                                                |                                                                                                                                                                                             |                                                                                     |
| <b>Time frame: past 36 months</b>                         |                                                                                                                                                                                |                                                                                                                                                                                             |                                                                                     |
| 2                                                         |                                                                                                                                                                                | <u>      </u> None                                                                                                                                                                          |                                                                                     |

|    |                                                                                                              |           |  |
|----|--------------------------------------------------------------------------------------------------------------|-----------|--|
|    | Grants or contracts from any entity (if not indicated in item #1 above).                                     |           |  |
| 3  | Royalties or licenses                                                                                        | ____ None |  |
|    |                                                                                                              |           |  |
|    |                                                                                                              |           |  |
| 4  | Consulting fees                                                                                              | ____ None |  |
|    |                                                                                                              |           |  |
|    |                                                                                                              |           |  |
| 5  | Payment or honoraria for lectures, presentations, speakers bureaus, manuscript writing or educational events | ____ None |  |
|    |                                                                                                              |           |  |
|    |                                                                                                              |           |  |
| 6  | Payment for expert testimony                                                                                 | ____ None |  |
|    |                                                                                                              |           |  |
|    |                                                                                                              |           |  |
| 7  | Support for attending meetings and/or travel                                                                 | ____ None |  |
|    |                                                                                                              |           |  |
|    |                                                                                                              |           |  |
| 8  | Patents planned, issued or pending                                                                           | ____ None |  |
|    |                                                                                                              |           |  |
|    |                                                                                                              |           |  |
| 9  | Participation on a Data Safety Monitoring Board or Advisory Board                                            | ____ None |  |
|    |                                                                                                              |           |  |
|    |                                                                                                              |           |  |
| 10 | Leadership or fiduciary role in other board, society, committee or advocacy group, paid or unpaid            | ____ None |  |
|    |                                                                                                              |           |  |
|    |                                                                                                              |           |  |
| 11 | Stock or stock options                                                                                       | ____ None |  |
|    |                                                                                                              |           |  |
|    |                                                                                                              |           |  |
| 12 | Receipt of equipment, materials, drugs, medical writing, gifts or other services                             | ____ None |  |
|    |                                                                                                              |           |  |
|    |                                                                                                              |           |  |
| 13 | Other financial or non-financial interests                                                                   | ____ None |  |
|    |                                                                                                              |           |  |
|    |                                                                                                              |           |  |



Please place an "X" next to the following statement to indicate your agreement:

☒ I certify that I have answered every question and have not altered the wording of any of the questions on this form.

# ICMJE DISCLOSURE FORM

Date: 08/30/21  
 Your Name: STEPHANIE XAVIER  
 Manuscript Title: Multicenter randomized phase 2 trial of atezolizumab with or without cobimetinib in biliary tract cancers (BTCs)  
 Manuscript number (if known): 152670-JCI-CMED-1

In the interest of transparency, we ask you to disclose all relationships/activities/interests listed below that are related to the content of your manuscript. "Related" means any relation with for-profit or not-for-profit third parties whose interests may be affected by the content of the manuscript. Disclosure represents a commitment to transparency and does not necessarily indicate a bias. If you are in doubt about whether to list a relationship/activity/interest, it is preferable that you do so.

The following questions apply to the author's relationships/activities/interests as they relate to the current manuscript only.

The author's relationships/activities/interests should be defined broadly. For example, if your manuscript pertains to the epidemiology of hypertension, you should declare all relationships with manufacturers of antihypertensive medication, even if that medication is not mentioned in the manuscript.

In item #1 below, report all support for the work reported in this manuscript without time limit. For all other items, the time frame for disclosure is the past 36 months.

|                                                           |                                                                                                                                                                                | Name all entities with whom you have this relationship or indicate none (add rows as needed) | Specifications/Comments (e.g., if payments were made to you or to your institution) |
|-----------------------------------------------------------|--------------------------------------------------------------------------------------------------------------------------------------------------------------------------------|----------------------------------------------------------------------------------------------|-------------------------------------------------------------------------------------|
| <b>Time frame: Since the initial planning of the work</b> |                                                                                                                                                                                |                                                                                              |                                                                                     |
| 1                                                         | All support for the present manuscript (e.g., funding, provision of study materials, medical writing, article processing charges, etc.)<br><b>No time limit for this item.</b> | <input checked="" type="checkbox"/> None                                                     |                                                                                     |
|                                                           |                                                                                                                                                                                |                                                                                              |                                                                                     |
|                                                           |                                                                                                                                                                                |                                                                                              |                                                                                     |
|                                                           |                                                                                                                                                                                |                                                                                              |                                                                                     |
|                                                           |                                                                                                                                                                                |                                                                                              |                                                                                     |
|                                                           |                                                                                                                                                                                |                                                                                              |                                                                                     |
|                                                           |                                                                                                                                                                                |                                                                                              |                                                                                     |
| <b>Time frame: past 36 months</b>                         |                                                                                                                                                                                |                                                                                              |                                                                                     |
| 2                                                         | Grants or contracts from any entity (if not indicated in item #1 above).                                                                                                       | <input checked="" type="checkbox"/> None                                                     |                                                                                     |
|                                                           |                                                                                                                                                                                |                                                                                              |                                                                                     |
|                                                           |                                                                                                                                                                                |                                                                                              |                                                                                     |
| 3                                                         | Royalties or licenses                                                                                                                                                          | <input checked="" type="checkbox"/> None                                                     |                                                                                     |
|                                                           |                                                                                                                                                                                |                                                                                              |                                                                                     |

|    |                                                                                                              |                                          |  |
|----|--------------------------------------------------------------------------------------------------------------|------------------------------------------|--|
|    |                                                                                                              |                                          |  |
| 4  | Consulting fees                                                                                              | <input checked="" type="checkbox"/> None |  |
|    |                                                                                                              |                                          |  |
|    |                                                                                                              |                                          |  |
| 5  | Payment or honoraria for lectures, presentations, speakers bureaus, manuscript writing or educational events | <input checked="" type="checkbox"/> None |  |
|    |                                                                                                              |                                          |  |
|    |                                                                                                              |                                          |  |
| 6  | Payment for expert testimony                                                                                 | <input checked="" type="checkbox"/> None |  |
|    |                                                                                                              |                                          |  |
|    |                                                                                                              |                                          |  |
| 7  | Support for attending meetings and/or travel                                                                 | <input checked="" type="checkbox"/> None |  |
|    |                                                                                                              |                                          |  |
|    |                                                                                                              |                                          |  |
| 8  | Patents planned, issued or pending                                                                           | <input checked="" type="checkbox"/> None |  |
|    |                                                                                                              |                                          |  |
|    |                                                                                                              |                                          |  |
| 9  | Participation on a Data Safety Monitoring Board or Advisory Board                                            | <input checked="" type="checkbox"/> None |  |
|    |                                                                                                              |                                          |  |
|    |                                                                                                              |                                          |  |
| 10 | Leadership or fiduciary role in other board, society, committee or advocacy group, paid or unpaid            | <input checked="" type="checkbox"/> None |  |
|    |                                                                                                              |                                          |  |
|    |                                                                                                              |                                          |  |
| 11 | Stock or stock options                                                                                       | <input checked="" type="checkbox"/> None |  |
|    |                                                                                                              |                                          |  |
|    |                                                                                                              |                                          |  |
|    |                                                                                                              |                                          |  |
| 12 | Receipt of equipment, materials, drugs, medical writing, gifts or other services                             | <input checked="" type="checkbox"/> None |  |
|    |                                                                                                              |                                          |  |
|    |                                                                                                              |                                          |  |
| 13 | Other financial or non-financial interests                                                                   | <input checked="" type="checkbox"/> None |  |
|    |                                                                                                              |                                          |  |
|    |                                                                                                              |                                          |  |

Please place an "X" next to the following statement to indicate your agreement:

☒ I certify that I have answered every question and have not altered the wording of any of the questions on this form.

# ICMJE DISCLOSURE FORM

Date: Aug 30, 2021  
 Your Name: Aiwu Ruth He  
 Manuscript Title: Multicenter randomized phase 2 trial of atezolizumab with or without cobimetinib in biliary tract cancers (BTCs)  
 Manuscript number (if known): 152670-JCI-CMED-1

In the interest of transparency, we ask you to disclose all relationships/activities/interests listed below that are related to the content of your manuscript. "Related" means any relation with for-profit or not-for-profit third parties whose interests may be affected by the content of the manuscript. Disclosure represents a commitment to transparency and does not necessarily indicate a bias. If you are in doubt about whether to list a relationship/activity/interest, it is preferable that you do so.

The following questions apply to the author's relationships/activities/interests as they relate to the current manuscript only.

The author's relationships/activities/interests should be defined broadly. For example, if your manuscript pertains to the epidemiology of hypertension, you should declare all relationships with manufacturers of antihypertensive medication, even if that medication is not mentioned in the manuscript.

In item #1 below, report all support for the work reported in this manuscript without time limit. For all other items, the time frame for disclosure is the past 36 months.

|                                                           |                                                                                                                                                                                | Name all entities with whom you have this relationship or indicate none (add rows as needed) | Specifications/Comments (e.g., if payments were made to you or to your institution) |
|-----------------------------------------------------------|--------------------------------------------------------------------------------------------------------------------------------------------------------------------------------|----------------------------------------------------------------------------------------------|-------------------------------------------------------------------------------------|
| <b>Time frame: Since the initial planning of the work</b> |                                                                                                                                                                                |                                                                                              |                                                                                     |
| 1                                                         | All support for the present manuscript (e.g., funding, provision of study materials, medical writing, article processing charges, etc.)<br><b>No time limit for this item.</b> | <input checked="" type="checkbox"/> None                                                     |                                                                                     |
|                                                           |                                                                                                                                                                                |                                                                                              |                                                                                     |
|                                                           |                                                                                                                                                                                |                                                                                              |                                                                                     |
|                                                           |                                                                                                                                                                                |                                                                                              |                                                                                     |
|                                                           |                                                                                                                                                                                |                                                                                              |                                                                                     |
|                                                           |                                                                                                                                                                                |                                                                                              |                                                                                     |
|                                                           |                                                                                                                                                                                |                                                                                              |                                                                                     |
| <b>Time frame: past 36 months</b>                         |                                                                                                                                                                                |                                                                                              |                                                                                     |
| 2                                                         | Grants or contracts from any entity (if not indicated in item #1 above).                                                                                                       | <input type="checkbox"/> None                                                                | Merck, Genentech                                                                    |
|                                                           |                                                                                                                                                                                |                                                                                              |                                                                                     |
|                                                           |                                                                                                                                                                                |                                                                                              |                                                                                     |
| 3                                                         | Royalties or licenses                                                                                                                                                          | <input checked="" type="checkbox"/> None                                                     |                                                                                     |
|                                                           |                                                                                                                                                                                |                                                                                              |                                                                                     |

|    |                                                                                                              |                                          |            |
|----|--------------------------------------------------------------------------------------------------------------|------------------------------------------|------------|
|    |                                                                                                              |                                          |            |
| 4  | Consulting fees                                                                                              | <input checked="" type="checkbox"/> None |            |
|    |                                                                                                              |                                          |            |
|    |                                                                                                              |                                          |            |
| 5  | Payment or honoraria for lectures, presentations, speakers bureaus, manuscript writing or educational events | <input type="checkbox"/> None            | BMS, Eisai |
|    |                                                                                                              |                                          |            |
|    |                                                                                                              |                                          |            |
| 6  | Payment for expert testimony                                                                                 | <input checked="" type="checkbox"/> None |            |
|    |                                                                                                              |                                          |            |
|    |                                                                                                              |                                          |            |
| 7  | Support for attending meetings and/or travel                                                                 | <input checked="" type="checkbox"/> None |            |
|    |                                                                                                              |                                          |            |
|    |                                                                                                              |                                          |            |
| 8  | Patents planned, issued or pending                                                                           | <input checked="" type="checkbox"/> None |            |
|    |                                                                                                              |                                          |            |
|    |                                                                                                              |                                          |            |
| 9  | Participation on a Data Safety Monitoring Board or Advisory Board                                            | <input checked="" type="checkbox"/> None |            |
|    |                                                                                                              |                                          |            |
|    |                                                                                                              |                                          |            |
| 10 | Leadership or fiduciary role in other board, society, committee or advocacy group, paid or unpaid            | <input checked="" type="checkbox"/> None |            |
|    |                                                                                                              |                                          |            |
|    |                                                                                                              |                                          |            |
| 11 | Stock or stock options                                                                                       | <input checked="" type="checkbox"/> None |            |
|    |                                                                                                              |                                          |            |
|    |                                                                                                              |                                          |            |
| 12 | Receipt of equipment, materials, drugs, medical writing, gifts or other services                             | <input checked="" type="checkbox"/> None |            |
|    |                                                                                                              |                                          |            |
|    |                                                                                                              |                                          |            |
| 13 | Other financial or non-financial interests                                                                   | <input type="checkbox"/> None            |            |
|    |                                                                                                              |                                          |            |
|    |                                                                                                              |                                          |            |

Please place an "X" next to the following statement to indicate your agreement:

☒ I certify that I have answered every question and have not altered the wording of any of the questions on this form.

# ICMJE DISCLOSURE FORM

Date: 08/30/2021

Your Name: Qingfeng Zhu

Manuscript Title: Multicenter randomized phase 2 trial of atezolizumab with or without cobimetinib in biliary tract cancers (BTCs)

Manuscript number (if known): 152670-JCI-CMED-1

In the interest of transparency, we ask you to disclose all relationships/activities/interests listed below that are related to the content of your manuscript. "Related" means any relation with for-profit or not-for-profit third parties whose interests may be affected by the content of the manuscript. Disclosure represents a commitment to transparency and does not necessarily indicate a bias. If you are in doubt about whether to list a relationship/activity/interest, it is preferable that you do so.

The following questions apply to the author's relationships/activities/interests as they relate to the current manuscript only.

The author's relationships/activities/interests should be defined broadly. For example, if your manuscript pertains to the epidemiology of hypertension, you should declare all relationships with manufacturers of antihypertensive medication, even if that medication is not mentioned in the manuscript.

In item #1 below, report all support for the work reported in this manuscript without time limit. For all other items, the time frame for disclosure is the past 36 months.

|                                                           |                                                                                                                                                                                | Name all entities with whom you have this relationship or indicate none (add rows as needed) | Specifications/Comments (e.g., if payments were made to you or to your institution) |
|-----------------------------------------------------------|--------------------------------------------------------------------------------------------------------------------------------------------------------------------------------|----------------------------------------------------------------------------------------------|-------------------------------------------------------------------------------------|
| <b>Time frame: Since the initial planning of the work</b> |                                                                                                                                                                                |                                                                                              |                                                                                     |
| 1                                                         | All support for the present manuscript (e.g., funding, provision of study materials, medical writing, article processing charges, etc.)<br><b>No time limit for this item.</b> | <input checked="" type="checkbox"/> None                                                     |                                                                                     |
|                                                           |                                                                                                                                                                                |                                                                                              |                                                                                     |
|                                                           |                                                                                                                                                                                |                                                                                              |                                                                                     |
|                                                           |                                                                                                                                                                                |                                                                                              |                                                                                     |
|                                                           |                                                                                                                                                                                |                                                                                              |                                                                                     |
|                                                           |                                                                                                                                                                                |                                                                                              |                                                                                     |
|                                                           |                                                                                                                                                                                |                                                                                              |                                                                                     |
| <b>Time frame: past 36 months</b>                         |                                                                                                                                                                                |                                                                                              |                                                                                     |
| 2                                                         | Grants or contracts from any entity (if not indicated in item #1 above).                                                                                                       | <input checked="" type="checkbox"/> None                                                     |                                                                                     |
|                                                           |                                                                                                                                                                                |                                                                                              |                                                                                     |
|                                                           |                                                                                                                                                                                |                                                                                              |                                                                                     |
| 3                                                         | Royalties or licenses                                                                                                                                                          | <input checked="" type="checkbox"/> None                                                     |                                                                                     |
|                                                           |                                                                                                                                                                                |                                                                                              |                                                                                     |

|    |                                                                                                              |                                          |  |
|----|--------------------------------------------------------------------------------------------------------------|------------------------------------------|--|
|    |                                                                                                              |                                          |  |
| 4  | Consulting fees                                                                                              | <input checked="" type="checkbox"/> None |  |
|    |                                                                                                              |                                          |  |
|    |                                                                                                              |                                          |  |
| 5  | Payment or honoraria for lectures, presentations, speakers bureaus, manuscript writing or educational events | <input checked="" type="checkbox"/> None |  |
|    |                                                                                                              |                                          |  |
|    |                                                                                                              |                                          |  |
| 6  | Payment for expert testimony                                                                                 | <input checked="" type="checkbox"/> None |  |
|    |                                                                                                              |                                          |  |
|    |                                                                                                              |                                          |  |
| 7  | Support for attending meetings and/or travel                                                                 | <input checked="" type="checkbox"/> None |  |
|    |                                                                                                              |                                          |  |
|    |                                                                                                              |                                          |  |
| 8  | Patents planned, issued or pending                                                                           | <input checked="" type="checkbox"/> None |  |
|    |                                                                                                              |                                          |  |
|    |                                                                                                              |                                          |  |
| 9  | Participation on a Data Safety Monitoring Board or Advisory Board                                            | <input checked="" type="checkbox"/> None |  |
|    |                                                                                                              |                                          |  |
|    |                                                                                                              |                                          |  |
| 10 | Leadership or fiduciary role in other board, society, committee or advocacy group, paid or unpaid            | <input checked="" type="checkbox"/> None |  |
|    |                                                                                                              |                                          |  |
|    |                                                                                                              |                                          |  |
| 11 | Stock or stock options                                                                                       | <input checked="" type="checkbox"/> None |  |
|    |                                                                                                              |                                          |  |
|    |                                                                                                              |                                          |  |
| 12 | Receipt of equipment, materials, drugs, medical writing, gifts or other services                             | <input checked="" type="checkbox"/> None |  |
|    |                                                                                                              |                                          |  |
|    |                                                                                                              |                                          |  |
| 13 | Other financial or non-financial interests                                                                   | <input checked="" type="checkbox"/> None |  |
|    |                                                                                                              |                                          |  |
|    |                                                                                                              |                                          |  |

Please place an "X" next to the following statement to indicate your agreement:

☒ I certify that I have answered every question and have not altered the wording of any of the questions on this form.

# ICMJE DISCLOSURE FORM

Date: 9-2-2021

Your Name: **Lipika Goyal, MD**

Manuscript Title: Multicenter randomized phase 2 trial of atezolizumab with or without cobimetinib in biliary tract cancers (BTCs)

Manuscript number (if known): 152670-JCI-CMED-1

In the interest of transparency, we ask you to disclose all relationships/activities/interests listed below that are related to the content of your manuscript. "Related" means any relation with for-profit or not-for-profit third parties whose interests may be affected by the content of the manuscript. Disclosure represents a commitment to transparency and does not necessarily indicate a bias. If you are in doubt about whether to list a relationship/activity/interest, it is preferable that you do so.

The following questions apply to the author's relationships/activities/interests as they relate to the current manuscript only.

The author's relationships/activities/interests should be defined broadly. For example, if your manuscript pertains to the epidemiology of hypertension, you should declare all relationships with manufacturers of antihypertensive medication, even if that medication is not mentioned in the manuscript.

In item #1 below, report all support for the work reported in this manuscript without time limit. For all other items, the time frame for disclosure is the past 36 months.

|                                                           |                                                                                                                                                                                | Name all entities with whom you have this relationship or indicate none (add rows as needed)                                                                                                                               | Specifications/Comments (e.g., if payments were made to you or to your institution) |
|-----------------------------------------------------------|--------------------------------------------------------------------------------------------------------------------------------------------------------------------------------|----------------------------------------------------------------------------------------------------------------------------------------------------------------------------------------------------------------------------|-------------------------------------------------------------------------------------|
| <b>Time frame: Since the initial planning of the work</b> |                                                                                                                                                                                |                                                                                                                                                                                                                            |                                                                                     |
| 1                                                         | All support for the present manuscript (e.g., funding, provision of study materials, medical writing, article processing charges, etc.)<br><b>No time limit for this item.</b> |                                                                                                                                                                                                                            |                                                                                     |
| <b>Time frame: past 36 months</b>                         |                                                                                                                                                                                |                                                                                                                                                                                                                            |                                                                                     |
| 2                                                         | Grants or contracts from any entity (if not indicated in item #1 above).                                                                                                       | Adaptimmune, Bayer, Eisai, Merck, MacroGenics, Genentech, Novartis, Incyte, Eli Lilly, Loxo Oncology, LEAP Therapeutics, QED Therapeutics, Servier, Taiho Oncology Inc., Relay Therapeutics, Bristol Meyers Squibb, Nucana | To Institution                                                                      |
|                                                           |                                                                                                                                                                                |                                                                                                                                                                                                                            |                                                                                     |



|    |                                                                                                                          |                                                                                                                                                                                                                             |         |
|----|--------------------------------------------------------------------------------------------------------------------------|-----------------------------------------------------------------------------------------------------------------------------------------------------------------------------------------------------------------------------|---------|
|    |                                                                                                                          |                                                                                                                                                                                                                             |         |
| 3  | Royalties or licenses                                                                                                    | _____ None                                                                                                                                                                                                                  |         |
|    |                                                                                                                          |                                                                                                                                                                                                                             |         |
|    |                                                                                                                          |                                                                                                                                                                                                                             |         |
| 4  | Consulting fees                                                                                                          | Alentis Therapeutics AG,<br>Black Diamond,<br>H3Biomedicine,<br>Genentech, Exelixis, Incyte<br>Corporation, QED<br>Therapeutics, Servier,<br>Sirtex Medical Ltd, Taiho<br>Oncology, Inc. (Scientific<br>Advisory Committee) | To Self |
| 5  | Payment or honoraria for<br>lectures, presentations,<br>speakers bureaus,<br>manuscript writing or<br>educational events |                                                                                                                                                                                                                             |         |
|    |                                                                                                                          |                                                                                                                                                                                                                             |         |
|    |                                                                                                                          |                                                                                                                                                                                                                             |         |
| 6  | Payment for expert<br>testimony                                                                                          | _____ None                                                                                                                                                                                                                  |         |
|    |                                                                                                                          |                                                                                                                                                                                                                             |         |
|    |                                                                                                                          |                                                                                                                                                                                                                             |         |
| 7  | Support for attending<br>meetings and/or travel                                                                          |                                                                                                                                                                                                                             |         |
|    |                                                                                                                          |                                                                                                                                                                                                                             |         |
|    |                                                                                                                          |                                                                                                                                                                                                                             |         |
| 8  | Patents planned, issued or<br>pending                                                                                    | _____ None                                                                                                                                                                                                                  |         |
|    |                                                                                                                          |                                                                                                                                                                                                                             |         |
|    |                                                                                                                          |                                                                                                                                                                                                                             |         |
| 9  | Participation on a Data<br>Safety Monitoring Board or<br>Advisory Board                                                  | AstraZeneca                                                                                                                                                                                                                 | To Self |
|    |                                                                                                                          |                                                                                                                                                                                                                             |         |
|    |                                                                                                                          |                                                                                                                                                                                                                             |         |
| 10 | Leadership or fiduciary role<br>in other board, society,<br>committee or advocacy<br>group, paid or unpaid               | .                                                                                                                                                                                                                           |         |
|    |                                                                                                                          |                                                                                                                                                                                                                             |         |
|    |                                                                                                                          |                                                                                                                                                                                                                             |         |
| 11 | Stock or stock options                                                                                                   | _____ None                                                                                                                                                                                                                  |         |
|    |                                                                                                                          |                                                                                                                                                                                                                             |         |
|    |                                                                                                                          |                                                                                                                                                                                                                             |         |
| 12 | Receipt of equipment,<br>materials, drugs, medical<br>writing, gifts or other<br>services                                | _____ None                                                                                                                                                                                                                  |         |
|    |                                                                                                                          |                                                                                                                                                                                                                             |         |
|    |                                                                                                                          |                                                                                                                                                                                                                             |         |
| 13 | Other financial or non-<br>financial interests                                                                           | _____ None                                                                                                                                                                                                                  |         |

|  |  |  |  |
|--|--|--|--|
|  |  |  |  |
|  |  |  |  |

**Please place an “X” next to the following statement to indicate your agreement:**

**X   I certify that I have answered every question and have not altered the wording of any of the questions on this form.**

# ICMJE DISCLOSURE FORM

Date: 8/31/21

Your Name: S. Lindsey Davis

Manuscript Title: Multicenter randomized phase 2 trial of atezolizumab with or without cobimetinib in biliary tract cancers (BTCs)

Manuscript number (if known): 152670-JCI-CMED-1

In the interest of transparency, we ask you to disclose all relationships/activities/interests listed below that are related to the content of your manuscript. "Related" means any relation with for-profit or not-for-profit third parties whose interests may be affected by the content of the manuscript. Disclosure represents a commitment to transparency and does not necessarily indicate a bias. If you are in doubt about whether to list a relationship/activity/interest, it is preferable that you do so.

The following questions apply to the author's relationships/activities/interests as they relate to the current manuscript only.

The author's relationships/activities/interests should be defined broadly. For example, if your manuscript pertains to the epidemiology of hypertension, you should declare all relationships with manufacturers of antihypertensive medication, even if that medication is not mentioned in the manuscript.

In item #1 below, report all support for the work reported in this manuscript without time limit. For all other items, the time frame for disclosure is the past 36 months.

|                                                           |                                                                                                                                                                                | Name all entities with whom you have this relationship or indicate none (add rows as needed)     | Specifications/Comments (e.g., if payments were made to you or to your institution)                        |
|-----------------------------------------------------------|--------------------------------------------------------------------------------------------------------------------------------------------------------------------------------|--------------------------------------------------------------------------------------------------|------------------------------------------------------------------------------------------------------------|
| <b>Time frame: Since the initial planning of the work</b> |                                                                                                                                                                                |                                                                                                  |                                                                                                            |
| 1                                                         | All support for the present manuscript (e.g., funding, provision of study materials, medical writing, article processing charges, etc.)<br><b>No time limit for this item.</b> | <input checked="" type="checkbox"/> None                                                         |                                                                                                            |
|                                                           |                                                                                                                                                                                |                                                                                                  |                                                                                                            |
|                                                           |                                                                                                                                                                                |                                                                                                  |                                                                                                            |
|                                                           |                                                                                                                                                                                |                                                                                                  |                                                                                                            |
|                                                           |                                                                                                                                                                                |                                                                                                  |                                                                                                            |
|                                                           |                                                                                                                                                                                |                                                                                                  |                                                                                                            |
|                                                           |                                                                                                                                                                                |                                                                                                  |                                                                                                            |
| <b>Time frame: past 36 months</b>                         |                                                                                                                                                                                |                                                                                                  |                                                                                                            |
| 2                                                         | Grants or contracts from any entity (if not indicated in item #1 above).                                                                                                       | <input type="checkbox"/> None<br>Senhwa, Merck, BMS, Roche, AstraZeneca, EMD Serono, I-Mab, Oric | Contracts with my institution University of Colorado for Clinical trials on which I serve as local site-PI |
|                                                           |                                                                                                                                                                                |                                                                                                  |                                                                                                            |
|                                                           |                                                                                                                                                                                |                                                                                                  |                                                                                                            |
| 3                                                         | Royalties or licenses                                                                                                                                                          | <input checked="" type="checkbox"/> None                                                         |                                                                                                            |

|    |                                                                                                              |                 |                                                                                     |
|----|--------------------------------------------------------------------------------------------------------------|-----------------|-------------------------------------------------------------------------------------|
|    |                                                                                                              |                 |                                                                                     |
| 4  | Consulting fees                                                                                              | ___ None        |                                                                                     |
|    |                                                                                                              | Genentech       | Women in GI Oncology Advisory Board, 4/2021                                         |
| 5  | Payment or honoraria for lectures, presentations, speakers bureaus, manuscript writing or educational events | ___ None<br>BMS | "HCC, A Clinician's Perspective;" Oncology National Sales Meeting, 2/2019           |
|    |                                                                                                              | OncLive         | "Up-date in Esophageal/GEJ;" State of the Science Summit, 5/2019                    |
|    |                                                                                                              | Incyte          | "Clinical Approach to Cholangiocarcinoma;" Incyte US Medical Affairs Summit, 7/2019 |
| 6  | Payment for expert testimony                                                                                 | _X_ None        |                                                                                     |
|    |                                                                                                              |                 |                                                                                     |
|    |                                                                                                              |                 |                                                                                     |
| 7  | Support for attending meetings and/or travel                                                                 | _X_ None        |                                                                                     |
|    |                                                                                                              |                 |                                                                                     |
|    |                                                                                                              |                 |                                                                                     |
| 8  | Patents planned, issued or pending                                                                           | _X_ None        |                                                                                     |
|    |                                                                                                              |                 |                                                                                     |
|    |                                                                                                              |                 |                                                                                     |
| 9  | Participation on a Data Safety Monitoring Board or Advisory Board                                            | _X_ None        |                                                                                     |
|    |                                                                                                              |                 |                                                                                     |
|    |                                                                                                              |                 |                                                                                     |
| 10 | Leadership or fiduciary role in other board, society, committee or advocacy group, paid or unpaid            | _X_ None        |                                                                                     |
|    |                                                                                                              |                 |                                                                                     |
|    |                                                                                                              |                 |                                                                                     |
| 11 | Stock or stock options                                                                                       | _X_ None        |                                                                                     |
|    |                                                                                                              |                 |                                                                                     |
|    |                                                                                                              |                 |                                                                                     |
| 12 | Receipt of equipment, materials, drugs, medical writing, gifts or other services                             | _X_ None        |                                                                                     |
|    |                                                                                                              |                 |                                                                                     |
|    |                                                                                                              |                 |                                                                                     |
| 13 | Other financial or non-financial interests                                                                   | _X_ None        |                                                                                     |
|    |                                                                                                              |                 |                                                                                     |
|    |                                                                                                              |                 |                                                                                     |

Please place an "X" next to the following statement to indicate your agreement:

X I certify that I have answered every question and have not altered the wording of any of the questions on this form.



# ICMJE DISCLOSURE FORM

Date: September 2, 2021

Your Name: Leslie Cope

Manuscript Title: Multicenter randomized phase 2 trial of atezolizumab with or without cobimetinib in biliary tract cancers (BTCs)

Manuscript number (if known): 152670-JCI-CMED-1

In the interest of transparency, we ask you to disclose all relationships/activities/interests listed below that are related to the content of your manuscript. "Related" means any relation with for-profit or not-for-profit third parties whose interests may be affected by the content of the manuscript. Disclosure represents a commitment to transparency and does not necessarily indicate a bias. If you are in doubt about whether to list a relationship/activity/interest, it is preferable that you do so.

The following questions apply to the author's relationships/activities/interests as they relate to the current manuscript only.

The author's relationships/activities/interests should be defined broadly. For example, if your manuscript pertains to the epidemiology of hypertension, you should declare all relationships with manufacturers of antihypertensive medication, even if that medication is not mentioned in the manuscript.

In item #1 below, report all support for the work reported in this manuscript without time limit. For all other items, the time frame for disclosure is the past 36 months.

|                                                           |                                                                                                                                                                                | Name all entities with whom you have this relationship or indicate none (add rows as needed) | Specifications/Comments (e.g., if payments were made to you or to your institution) |
|-----------------------------------------------------------|--------------------------------------------------------------------------------------------------------------------------------------------------------------------------------|----------------------------------------------------------------------------------------------|-------------------------------------------------------------------------------------|
| <b>Time frame: Since the initial planning of the work</b> |                                                                                                                                                                                |                                                                                              |                                                                                     |
| 1                                                         | All support for the present manuscript (e.g., funding, provision of study materials, medical writing, article processing charges, etc.)<br><b>No time limit for this item.</b> | <input checked="" type="checkbox"/> None                                                     |                                                                                     |
|                                                           |                                                                                                                                                                                |                                                                                              |                                                                                     |
|                                                           |                                                                                                                                                                                |                                                                                              |                                                                                     |
|                                                           |                                                                                                                                                                                |                                                                                              |                                                                                     |
|                                                           |                                                                                                                                                                                |                                                                                              |                                                                                     |
|                                                           |                                                                                                                                                                                |                                                                                              |                                                                                     |
|                                                           |                                                                                                                                                                                |                                                                                              |                                                                                     |
| <b>Time frame: past 36 months</b>                         |                                                                                                                                                                                |                                                                                              |                                                                                     |
| 2                                                         | Grants or contracts from any entity (if not indicated in item #1 above).                                                                                                       | <input type="checkbox"/> None                                                                |                                                                                     |
|                                                           |                                                                                                                                                                                |                                                                                              |                                                                                     |
|                                                           |                                                                                                                                                                                |                                                                                              |                                                                                     |
| 3                                                         | Royalties or licenses                                                                                                                                                          | <input checked="" type="checkbox"/> None                                                     |                                                                                     |
|                                                           |                                                                                                                                                                                |                                                                                              |                                                                                     |

|    |                                                                                                              |                                          |  |
|----|--------------------------------------------------------------------------------------------------------------|------------------------------------------|--|
|    |                                                                                                              |                                          |  |
| 4  | Consulting fees                                                                                              | <input checked="" type="checkbox"/> None |  |
|    |                                                                                                              |                                          |  |
|    |                                                                                                              |                                          |  |
| 5  | Payment or honoraria for lectures, presentations, speakers bureaus, manuscript writing or educational events | <input checked="" type="checkbox"/> None |  |
|    |                                                                                                              |                                          |  |
|    |                                                                                                              |                                          |  |
| 6  | Payment for expert testimony                                                                                 | <input checked="" type="checkbox"/> None |  |
|    |                                                                                                              |                                          |  |
|    |                                                                                                              |                                          |  |
| 7  | Support for attending meetings and/or travel                                                                 | <input checked="" type="checkbox"/> None |  |
|    |                                                                                                              |                                          |  |
|    |                                                                                                              |                                          |  |
| 8  | Patents planned, issued or pending                                                                           | <input checked="" type="checkbox"/> None |  |
|    |                                                                                                              |                                          |  |
|    |                                                                                                              |                                          |  |
| 9  | Participation on a Data Safety Monitoring Board or Advisory Board                                            | <input checked="" type="checkbox"/> None |  |
|    |                                                                                                              |                                          |  |
|    |                                                                                                              |                                          |  |
| 10 | Leadership or fiduciary role in other board, society, committee or advocacy group, paid or unpaid            | <input checked="" type="checkbox"/> None |  |
|    |                                                                                                              |                                          |  |
|    |                                                                                                              |                                          |  |
| 11 | Stock or stock options                                                                                       | <input checked="" type="checkbox"/> None |  |
|    |                                                                                                              |                                          |  |
|    |                                                                                                              |                                          |  |
| 12 | Receipt of equipment, materials, drugs, medical writing, gifts or other services                             | <input checked="" type="checkbox"/> None |  |
|    |                                                                                                              |                                          |  |
|    |                                                                                                              |                                          |  |
| 13 | Other financial or non-financial interests                                                                   | <input checked="" type="checkbox"/> None |  |
|    |                                                                                                              |                                          |  |
|    |                                                                                                              |                                          |  |

Please place an "X" next to the following statement to indicate your agreement:

☒ I certify that I have answered every question and have not altered the wording of any of the questions on this form.

# ICMJE DISCLOSURE FORM

Date: 8/30/21  
 Your Name: Laura Williams Goff  
 Manuscript Title: Multicenter randomized phase 2 trial of atezolizumab with or without cobimetinib in biliary tract cancers (BTCs)  
 Manuscript number (if known): 152670-JCI-CMED-1

In the interest of transparency, we ask you to disclose all relationships/activities/interests listed below that are related to the content of your manuscript. "Related" means any relation with for-profit or not-for-profit third parties whose interests may be affected by the content of the manuscript. Disclosure represents a commitment to transparency and does not necessarily indicate a bias. If you are in doubt about whether to list a relationship/activity/interest, it is preferable that you do so.

The following questions apply to the author's relationships/activities/interests as they relate to the current manuscript only.

The author's relationships/activities/interests should be defined broadly. For example, if your manuscript pertains to the epidemiology of hypertension, you should declare all relationships with manufacturers of antihypertensive medication, even if that medication is not mentioned in the manuscript.

In item #1 below, report all support for the work reported in this manuscript without time limit. For all other items, the time frame for disclosure is the past 36 months.

|                                                           |                                                                                                                                                                                | Name all entities with whom you have this relationship or indicate none (add rows as needed) | Specifications/Comments (e.g., if payments were made to you or to your institution)                                                                    |
|-----------------------------------------------------------|--------------------------------------------------------------------------------------------------------------------------------------------------------------------------------|----------------------------------------------------------------------------------------------|--------------------------------------------------------------------------------------------------------------------------------------------------------|
| <b>Time frame: Since the initial planning of the work</b> |                                                                                                                                                                                |                                                                                              |                                                                                                                                                        |
| 1                                                         | All support for the present manuscript (e.g., funding, provision of study materials, medical writing, article processing charges, etc.)<br><b>No time limit for this item.</b> | <input checked="" type="checkbox"/> None                                                     |                                                                                                                                                        |
|                                                           |                                                                                                                                                                                |                                                                                              |                                                                                                                                                        |
|                                                           |                                                                                                                                                                                |                                                                                              |                                                                                                                                                        |
|                                                           |                                                                                                                                                                                |                                                                                              |                                                                                                                                                        |
|                                                           |                                                                                                                                                                                |                                                                                              |                                                                                                                                                        |
|                                                           |                                                                                                                                                                                |                                                                                              |                                                                                                                                                        |
|                                                           |                                                                                                                                                                                |                                                                                              |                                                                                                                                                        |
| <b>Time frame: past 36 months</b>                         |                                                                                                                                                                                |                                                                                              |                                                                                                                                                        |
| 2                                                         | Grants or contracts from any entity (if not indicated in item #1 above).                                                                                                       | <input type="checkbox"/> None                                                                | Astellas, Pfizer, Onyx, SunPharma, Lilly, BMS, Agios, ArQule, Basilea, H3Biomedicine, Incyte, Leap Therapeutics, ASLAN Pharmaceuticals, BeiGene, Merck |
|                                                           |                                                                                                                                                                                |                                                                                              |                                                                                                                                                        |
|                                                           |                                                                                                                                                                                |                                                                                              |                                                                                                                                                        |
| 3                                                         | Royalties or licenses                                                                                                                                                          | <input checked="" type="checkbox"/> None                                                     |                                                                                                                                                        |



|    |                                                                                                              |                                          |                                                              |
|----|--------------------------------------------------------------------------------------------------------------|------------------------------------------|--------------------------------------------------------------|
|    |                                                                                                              |                                          |                                                              |
| 4  | Consulting fees                                                                                              | <input type="checkbox"/> None            | Lilly, Eisai, Bayer/Onyx, QED, Genentech, Merck, AstraZeneca |
|    |                                                                                                              |                                          |                                                              |
|    |                                                                                                              |                                          |                                                              |
| 5  | Payment or honoraria for lectures, presentations, speakers bureaus, manuscript writing or educational events | <input checked="" type="checkbox"/> None |                                                              |
|    |                                                                                                              |                                          |                                                              |
|    |                                                                                                              |                                          |                                                              |
| 6  | Payment for expert testimony                                                                                 | <input checked="" type="checkbox"/> None |                                                              |
|    |                                                                                                              |                                          |                                                              |
|    |                                                                                                              |                                          |                                                              |
| 7  | Support for attending meetings and/or travel                                                                 | <input checked="" type="checkbox"/> None |                                                              |
|    |                                                                                                              |                                          |                                                              |
|    |                                                                                                              |                                          |                                                              |
| 8  | Patents planned, issued or pending                                                                           | <input checked="" type="checkbox"/> None |                                                              |
|    |                                                                                                              |                                          |                                                              |
|    |                                                                                                              |                                          |                                                              |
| 9  | Participation on a Data Safety Monitoring Board or Advisory Board                                            | <input type="checkbox"/> None            | Newlink Genetics                                             |
|    |                                                                                                              |                                          |                                                              |
|    |                                                                                                              |                                          |                                                              |
| 10 | Leadership or fiduciary role in other board, society, committee or advocacy group, paid or unpaid            | <input checked="" type="checkbox"/> None |                                                              |
|    |                                                                                                              |                                          |                                                              |
|    |                                                                                                              |                                          |                                                              |
| 11 | Stock or stock options                                                                                       | <input checked="" type="checkbox"/> None |                                                              |
|    |                                                                                                              |                                          |                                                              |
|    |                                                                                                              |                                          |                                                              |
| 12 | Receipt of equipment, materials, drugs, medical writing, gifts or other services                             | <input checked="" type="checkbox"/> None |                                                              |
|    |                                                                                                              |                                          |                                                              |
|    |                                                                                                              |                                          |                                                              |
| 13 | Other financial or non-financial interests                                                                   | <input checked="" type="checkbox"/> None |                                                              |
|    |                                                                                                              |                                          |                                                              |
|    |                                                                                                              |                                          |                                                              |

Please place an "X" next to the following statement to indicate your agreement:

☒ I certify that I have answered every question and have not altered the wording of any of the questions on this form.

## ICMJE DISCLOSURE FORM

**Date:** 08/30/2021

**Your Name:** Lauren Dennison

**Manuscript Title:** Multicenter randomized phase 2 trial of atezolizumab with or without cobimetinib in biliary tract cancers (BTCs)

**Manuscript number (if known):** 152670-JCI-CMED-1

In the interest of transparency, we ask you to disclose all relationships/activities/interests listed below that are related to the content of your manuscript. "Related" means any relation with for-profit or not-for-profit third parties whose interests may be affected by the content of the manuscript. Disclosure represents a commitment to transparency and does not necessarily indicate a bias. If you are in doubt about whether to list a relationship/activity/interest, it is preferable that you do so.

The following questions apply to the author's relationships/activities/interests as they relate to the current manuscript only.

The author's relationships/activities/interests should be defined broadly. For example, if your manuscript pertains to the epidemiology of hypertension, you should declare all relationships with manufacturers of antihypertensive medication, even if that medication is not mentioned in the manuscript.

In item #1 below, report all support for the work reported in this manuscript without time limit. For all other items, the time frame for disclosure is the past 36 months.

|                                                           |                                                                                                                                                                                | Name all entities with whom you have this relationship or indicate none (add rows as needed) | Specifications/Comments (e.g., if payments were made to you or to your institution) |
|-----------------------------------------------------------|--------------------------------------------------------------------------------------------------------------------------------------------------------------------------------|----------------------------------------------------------------------------------------------|-------------------------------------------------------------------------------------|
| <b>Time frame: Since the initial planning of the work</b> |                                                                                                                                                                                |                                                                                              |                                                                                     |
| 1                                                         | All support for the present manuscript (e.g., funding, provision of study materials, medical writing, article processing charges, etc.)<br><b>No time limit for this item.</b> | <input checked="" type="checkbox"/> None                                                     |                                                                                     |
|                                                           |                                                                                                                                                                                |                                                                                              |                                                                                     |
|                                                           |                                                                                                                                                                                |                                                                                              |                                                                                     |
|                                                           |                                                                                                                                                                                |                                                                                              |                                                                                     |
|                                                           |                                                                                                                                                                                |                                                                                              |                                                                                     |
|                                                           |                                                                                                                                                                                |                                                                                              |                                                                                     |
|                                                           |                                                                                                                                                                                |                                                                                              |                                                                                     |
| <b>Time frame: past 36 months</b>                         |                                                                                                                                                                                |                                                                                              |                                                                                     |
| 2                                                         | Grants or contracts from any entity (if not indicated in item #1 above).                                                                                                       | <input checked="" type="checkbox"/> None                                                     |                                                                                     |
|                                                           |                                                                                                                                                                                |                                                                                              |                                                                                     |
|                                                           |                                                                                                                                                                                |                                                                                              |                                                                                     |
| 3                                                         | Royalties or licenses                                                                                                                                                          | <input checked="" type="checkbox"/> None                                                     |                                                                                     |
|                                                           |                                                                                                                                                                                |                                                                                              |                                                                                     |

|    |                                                                                                              |                                          |  |
|----|--------------------------------------------------------------------------------------------------------------|------------------------------------------|--|
|    |                                                                                                              |                                          |  |
| 4  | Consulting fees                                                                                              | <input checked="" type="checkbox"/> None |  |
|    |                                                                                                              |                                          |  |
|    |                                                                                                              |                                          |  |
| 5  | Payment or honoraria for lectures, presentations, speakers bureaus, manuscript writing or educational events | <input checked="" type="checkbox"/> None |  |
|    |                                                                                                              |                                          |  |
|    |                                                                                                              |                                          |  |
| 6  | Payment for expert testimony                                                                                 | <input checked="" type="checkbox"/> None |  |
|    |                                                                                                              |                                          |  |
|    |                                                                                                              |                                          |  |
| 7  | Support for attending meetings and/or travel                                                                 | <input checked="" type="checkbox"/> None |  |
|    |                                                                                                              |                                          |  |
|    |                                                                                                              |                                          |  |
| 8  | Patents planned, issued or pending                                                                           | <input checked="" type="checkbox"/> None |  |
|    |                                                                                                              |                                          |  |
|    |                                                                                                              |                                          |  |
| 9  | Participation on a Data Safety Monitoring Board or Advisory Board                                            | <input checked="" type="checkbox"/> None |  |
|    |                                                                                                              |                                          |  |
|    |                                                                                                              |                                          |  |
| 10 | Leadership or fiduciary role in other board, society, committee or advocacy group, paid or unpaid            | <input checked="" type="checkbox"/> None |  |
|    |                                                                                                              |                                          |  |
|    |                                                                                                              |                                          |  |
| 11 | Stock or stock options                                                                                       | <input checked="" type="checkbox"/> None |  |
|    |                                                                                                              |                                          |  |
|    |                                                                                                              |                                          |  |
| 12 | Receipt of equipment, materials, drugs, medical writing, gifts or other services                             | <input checked="" type="checkbox"/> None |  |
|    |                                                                                                              |                                          |  |
|    |                                                                                                              |                                          |  |
| 13 | Other financial or non-financial interests                                                                   | <input checked="" type="checkbox"/> None |  |
|    |                                                                                                              |                                          |  |
|    |                                                                                                              |                                          |  |

Please place an "X" next to the following statement to indicate your agreement:

☒ I certify that I have answered every question and have not altered the wording of any of the questions on this form.

# ICMJE DISCLOSURE FORM

Date: August 30, 2021  
 Your Name: Jill Lacy  
 Manuscript Title: Multicenter randomized phase 2 trial of atezolizumab with or without cobimetinib in biliary tract cancers (BTCs)  
 Manuscript number (if known): 152670-JCI-CMED-1

In the interest of transparency, we ask you to disclose all relationships/activities/interests listed below that are related to the content of your manuscript. "Related" means any relation with for-profit or not-for-profit third parties whose interests may be affected by the content of the manuscript. Disclosure represents a commitment to transparency and does not necessarily indicate a bias. If you are in doubt about whether to list a relationship/activity/interest, it is preferable that you do so.

The following questions apply to the author's relationships/activities/interests as they relate to the current manuscript only.

The author's relationships/activities/interests should be defined broadly. For example, if your manuscript pertains to the epidemiology of hypertension, you should declare all relationships with manufacturers of antihypertensive medication, even if that medication is not mentioned in the manuscript.

In item #1 below, report all support for the work reported in this manuscript without time limit. For all other items, the time frame for disclosure is the past 36 months.

|                                                           |                                                                                                                                                                                | Name all entities with whom you have this relationship or indicate none (add rows as needed) | Specifications/Comments (e.g., if payments were made to you or to your institution) |
|-----------------------------------------------------------|--------------------------------------------------------------------------------------------------------------------------------------------------------------------------------|----------------------------------------------------------------------------------------------|-------------------------------------------------------------------------------------|
| <b>Time frame: Since the initial planning of the work</b> |                                                                                                                                                                                |                                                                                              |                                                                                     |
| 1                                                         | All support for the present manuscript (e.g., funding, provision of study materials, medical writing, article processing charges, etc.)<br><b>No time limit for this item.</b> | <input checked="" type="checkbox"/> None                                                     |                                                                                     |
|                                                           |                                                                                                                                                                                |                                                                                              |                                                                                     |
|                                                           |                                                                                                                                                                                |                                                                                              |                                                                                     |
|                                                           |                                                                                                                                                                                |                                                                                              |                                                                                     |
|                                                           |                                                                                                                                                                                |                                                                                              |                                                                                     |
|                                                           |                                                                                                                                                                                |                                                                                              |                                                                                     |
|                                                           |                                                                                                                                                                                |                                                                                              |                                                                                     |
| <b>Time frame: past 36 months</b>                         |                                                                                                                                                                                |                                                                                              |                                                                                     |
| 2                                                         | Grants or contracts from any entity (if not indicated in item #1 above).                                                                                                       | <input type="checkbox"/> None                                                                |                                                                                     |
|                                                           |                                                                                                                                                                                |                                                                                              |                                                                                     |
|                                                           |                                                                                                                                                                                |                                                                                              |                                                                                     |
| 3                                                         | Royalties or licenses                                                                                                                                                          | <input type="checkbox"/> None                                                                |                                                                                     |
|                                                           |                                                                                                                                                                                |                                                                                              |                                                                                     |

|    |                                                                                                              |                                                                          |                                                                                               |
|----|--------------------------------------------------------------------------------------------------------------|--------------------------------------------------------------------------|-----------------------------------------------------------------------------------------------|
|    |                                                                                                              |                                                                          |                                                                                               |
| 4  | Consulting fees                                                                                              | <input type="checkbox"/> None<br>Advisory Boards and Consulting Fees     | Deciphera, Ipsen, AstraZeneca, Celgene, Merck, Guidepoint, Aptitude Health, Bionest, Navigant |
|    |                                                                                                              |                                                                          |                                                                                               |
|    |                                                                                                              |                                                                          |                                                                                               |
| 5  | Payment or honoraria for lectures, presentations, speakers bureaus, manuscript writing or educational events | <input type="checkbox"/> None<br><input checked="" type="checkbox"/> Yes | CME Speaker, St Francis Hospital, Hartford CT                                                 |
|    |                                                                                                              |                                                                          |                                                                                               |
|    |                                                                                                              |                                                                          |                                                                                               |
| 6  | Payment for expert testimony                                                                                 | <input type="checkbox"/> None<br><input checked="" type="checkbox"/> Yes | Medical Malpractice Cases                                                                     |
|    |                                                                                                              |                                                                          |                                                                                               |
|    |                                                                                                              |                                                                          |                                                                                               |
| 7  | Support for attending meetings and/or travel                                                                 | <input checked="" type="checkbox"/> <input type="checkbox"/> None        |                                                                                               |
|    |                                                                                                              |                                                                          |                                                                                               |
|    |                                                                                                              |                                                                          |                                                                                               |
| 8  | Patents planned, issued or pending                                                                           | <input checked="" type="checkbox"/> <input type="checkbox"/> None        |                                                                                               |
|    |                                                                                                              |                                                                          |                                                                                               |
|    |                                                                                                              |                                                                          |                                                                                               |
| 9  | Participation on a Data Safety Monitoring Board or Advisory Board                                            | <input checked="" type="checkbox"/> <input type="checkbox"/> None        |                                                                                               |
|    |                                                                                                              |                                                                          |                                                                                               |
|    |                                                                                                              |                                                                          |                                                                                               |
| 10 | Leadership or fiduciary role in other board, society, committee or advocacy group, paid or unpaid            | <input type="checkbox"/> None<br>ASCO Editorial Board for ASCO-SEP       |                                                                                               |
|    |                                                                                                              |                                                                          |                                                                                               |
|    |                                                                                                              |                                                                          |                                                                                               |
| 11 | Stock or stock options                                                                                       | <input checked="" type="checkbox"/> <input type="checkbox"/> None        |                                                                                               |
|    |                                                                                                              |                                                                          |                                                                                               |
|    |                                                                                                              |                                                                          |                                                                                               |
| 12 | Receipt of equipment, materials, drugs, medical writing, gifts or other services                             | <input checked="" type="checkbox"/> <input type="checkbox"/> None        |                                                                                               |
|    |                                                                                                              |                                                                          |                                                                                               |
|    |                                                                                                              |                                                                          |                                                                                               |
| 13 | Other financial or non-financial interests                                                                   | <input checked="" type="checkbox"/> <input type="checkbox"/> None        |                                                                                               |
|    |                                                                                                              |                                                                          |                                                                                               |
|    |                                                                                                              |                                                                          |                                                                                               |

Please place an "X" next to the following statement to indicate your agreement:

☒ I certify that I have answered every question and have not altered the wording of any of the questions on this

**form.**

Date: August 30, 2021

Your Name: Helen Chen

Manuscript Title: Multicenter randomized phase 2 trial of atezolizumab with or without cobimetinib in biliary tract cancers (BTCs)

Manuscript number (if known): 152670-JCI-CMED-1

In the interest of transparency, we ask you to disclose all relationships/activities/interests listed below that are related to the content of your manuscript. "Related" means any relation with for-profit or not-for-profit third parties whose interests may be affected by the content of the manuscript. Disclosure represents a commitment to transparency and does not necessarily indicate a bias. If you are in doubt about whether to list a relationship/activity/interest, it is preferable that you do so.

The following questions apply to the author's relationships/activities/interests as they relate to the current manuscript only.

The author's relationships/activities/interests should be defined broadly. For example, if your manuscript pertains to the epidemiology of hypertension, you should declare all relationships with manufacturers of antihypertensive medication, even if that medication is not mentioned in the manuscript.

In item #1 below, report all support for the work reported in this manuscript without time limit. For all other items, the time frame for disclosure is the past 36 months.

|                                                    |                                                                                                                                                                                | Name all entities with whom you have this relationship or indicate none (add rows as needed) | Specifications/Comments (e.g., if payments were made to you or to your institution) |
|----------------------------------------------------|--------------------------------------------------------------------------------------------------------------------------------------------------------------------------------|----------------------------------------------------------------------------------------------|-------------------------------------------------------------------------------------|
| Time frame: Since the initial planning of the work |                                                                                                                                                                                |                                                                                              |                                                                                     |
| 1                                                  | All support for the present manuscript (e.g., funding, provision of study materials, medical writing, article processing charges, etc.)<br><b>No time limit for this item.</b> | <input checked="" type="checkbox"/> None                                                     |                                                                                     |
|                                                    |                                                                                                                                                                                |                                                                                              |                                                                                     |
|                                                    |                                                                                                                                                                                |                                                                                              |                                                                                     |
|                                                    |                                                                                                                                                                                |                                                                                              |                                                                                     |
|                                                    |                                                                                                                                                                                |                                                                                              |                                                                                     |
|                                                    |                                                                                                                                                                                |                                                                                              |                                                                                     |
|                                                    |                                                                                                                                                                                |                                                                                              |                                                                                     |
|                                                    |                                                                                                                                                                                |                                                                                              |                                                                                     |
| Time frame: past 36 months                         |                                                                                                                                                                                |                                                                                              |                                                                                     |
| 2                                                  | Grants or contracts from any entity (if not indicated in item #1 above).                                                                                                       | <input type="checkbox"/> None                                                                |                                                                                     |
|                                                    |                                                                                                                                                                                |                                                                                              |                                                                                     |
|                                                    |                                                                                                                                                                                |                                                                                              |                                                                                     |
| 3                                                  | Royalties or licenses                                                                                                                                                          | <input type="checkbox"/> None                                                                |                                                                                     |
|                                                    |                                                                                                                                                                                |                                                                                              |                                                                                     |
|                                                    |                                                                                                                                                                                |                                                                                              |                                                                                     |
| 4                                                  | Consulting fees                                                                                                                                                                | <input type="checkbox"/> None                                                                |                                                                                     |

|    |                                                                                                              |                                          |  |
|----|--------------------------------------------------------------------------------------------------------------|------------------------------------------|--|
|    |                                                                                                              |                                          |  |
|    |                                                                                                              |                                          |  |
|    |                                                                                                              |                                          |  |
| 5  | Payment or honoraria for lectures, presentations, speakers bureaus, manuscript writing or educational events | <input checked="" type="checkbox"/> None |  |
|    |                                                                                                              |                                          |  |
|    |                                                                                                              |                                          |  |
| 6  | Payment for expert testimony                                                                                 | <input type="checkbox"/> None            |  |
|    |                                                                                                              |                                          |  |
|    |                                                                                                              |                                          |  |
| 7  | Support for attending meetings and/or travel                                                                 | <input type="checkbox"/> None            |  |
|    |                                                                                                              |                                          |  |
|    |                                                                                                              |                                          |  |
| 8  | Patents planned, issued or pending                                                                           | <input type="checkbox"/> None            |  |
|    |                                                                                                              |                                          |  |
|    |                                                                                                              |                                          |  |
| 9  | Participation on a Data Safety Monitoring Board or Advisory Board                                            | <input type="checkbox"/> None            |  |
|    |                                                                                                              |                                          |  |
|    |                                                                                                              |                                          |  |
| 10 | Leadership or fiduciary role in other board, society, committee or advocacy group, paid or unpaid            | <input type="checkbox"/> None            |  |
|    |                                                                                                              |                                          |  |
|    |                                                                                                              |                                          |  |
| 11 | Stock or stock options                                                                                       | <input checked="" type="checkbox"/> None |  |
|    |                                                                                                              |                                          |  |
|    |                                                                                                              |                                          |  |
| 12 | Receipt of equipment, materials, drugs, medical writing, gifts or other services                             | <input type="checkbox"/> None            |  |
|    |                                                                                                              |                                          |  |
|    |                                                                                                              |                                          |  |
| 13 | Other financial or non-financial interests                                                                   | <input type="checkbox"/> None            |  |
|    |                                                                                                              |                                          |  |
|    |                                                                                                              |                                          |  |

Please place an “X” next to the following statement to indicate your agreement:

☒ I certify that I have answered every question and have not altered the wording of any of the questions on this form.



# ICMJE DISCLOSURE FORM

Date: 8/30/2021

Your Name: Gregory B. Lesinski

Manuscript Title: Multicenter randomized phase 2 trial of atezolizumab with or without cobimetinib in biliary tract cancers (BTCs)

Manuscript number (if known): 152670-JCI-CMED-1

In the interest of transparency, we ask you to disclose all relationships/activities/interests listed below that are related to the content of your manuscript. "Related" means any relation with for-profit or not-for-profit third parties whose interests may be affected by the content of the manuscript. Disclosure represents a commitment to transparency and does not necessarily indicate a bias. If you are in doubt about whether to list a relationship/activity/interest, it is preferable that you do so.

The following questions apply to the author's relationships/activities/interests as they relate to the current manuscript only.

The author's relationships/activities/interests should be defined broadly. For example, if your manuscript pertains to the epidemiology of hypertension, you should declare all relationships with manufacturers of antihypertensive medication, even if that medication is not mentioned in the manuscript.

In item #1 below, report all support for the work reported in this manuscript without time limit. For all other items, the time frame for disclosure is the past 36 months.

|                                                           |                                                                                                                                                                                | Name all entities with whom you have this relationship or indicate none (add rows as needed) | Specifications/Comments (e.g., if payments were made to you or to your institution) |
|-----------------------------------------------------------|--------------------------------------------------------------------------------------------------------------------------------------------------------------------------------|----------------------------------------------------------------------------------------------|-------------------------------------------------------------------------------------|
| <b>Time frame: Since the initial planning of the work</b> |                                                                                                                                                                                |                                                                                              |                                                                                     |
| 1                                                         | All support for the present manuscript (e.g., funding, provision of study materials, medical writing, article processing charges, etc.)<br><b>No time limit for this item.</b> | <u>None</u>                                                                                  |                                                                                     |
|                                                           |                                                                                                                                                                                |                                                                                              |                                                                                     |
|                                                           |                                                                                                                                                                                |                                                                                              |                                                                                     |
|                                                           |                                                                                                                                                                                |                                                                                              |                                                                                     |
|                                                           |                                                                                                                                                                                |                                                                                              |                                                                                     |
|                                                           |                                                                                                                                                                                |                                                                                              |                                                                                     |
|                                                           |                                                                                                                                                                                |                                                                                              |                                                                                     |
| <b>Time frame: past 36 months</b>                         |                                                                                                                                                                                |                                                                                              |                                                                                     |
| 2                                                         | Grants or contracts from any entity (if not indicated in item #1 above).                                                                                                       | <u>None</u><br>NIH/NCI                                                                       | RO1 CA228414-01, P30CA138292                                                        |
|                                                           |                                                                                                                                                                                | Merck and Co.                                                                                | Payment made to Emory University through sponsored research agreement               |
|                                                           |                                                                                                                                                                                | Bristol-myers Squibb                                                                         | Payment made to Emory University through sponsored research agreement               |
|                                                           |                                                                                                                                                                                | Boehringer-Ingelheim                                                                         | Payment made to Emory University through sponsored research agreement               |

|    |                                                                                                              |                                |                                                                       |
|----|--------------------------------------------------------------------------------------------------------------|--------------------------------|-----------------------------------------------------------------------|
|    |                                                                                                              | Vaccinex                       | Payment made to Emory University through sponsored research agreement |
| 3  | Royalties or licenses                                                                                        | ___ None                       |                                                                       |
|    |                                                                                                              |                                |                                                                       |
|    |                                                                                                              |                                |                                                                       |
| 4  | Consulting fees                                                                                              | ___ None<br>ProDa Biotech, LLC | Consulting. Received personal compensation.                           |
|    |                                                                                                              |                                |                                                                       |
|    |                                                                                                              |                                |                                                                       |
| 5  | Payment or honoraria for lectures, presentations, speakers bureaus, manuscript writing or educational events | __X__ None                     |                                                                       |
|    |                                                                                                              |                                |                                                                       |
|    |                                                                                                              |                                |                                                                       |
| 6  | Payment for expert testimony                                                                                 | __X__ None                     |                                                                       |
|    |                                                                                                              |                                |                                                                       |
|    |                                                                                                              |                                |                                                                       |
| 7  | Support for attending meetings and/or travel                                                                 | _X___ None                     |                                                                       |
|    |                                                                                                              |                                |                                                                       |
|    |                                                                                                              |                                |                                                                       |
| 8  | Patents planned, issued or pending                                                                           | __X__ None                     |                                                                       |
|    |                                                                                                              |                                |                                                                       |
|    |                                                                                                              |                                |                                                                       |
| 9  | Participation on a Data Safety Monitoring Board or Advisory Board                                            | ___X_ None                     |                                                                       |
|    |                                                                                                              |                                |                                                                       |
|    |                                                                                                              |                                |                                                                       |
| 10 | Leadership or fiduciary role in other board, society, committee or advocacy group, paid or unpaid            | __X__ None                     |                                                                       |
|    |                                                                                                              |                                |                                                                       |
|    |                                                                                                              |                                |                                                                       |
| 11 | Stock or stock options                                                                                       | __X__ None                     |                                                                       |
|    |                                                                                                              |                                |                                                                       |
|    |                                                                                                              |                                |                                                                       |
| 12 | Receipt of equipment, materials, drugs, medical writing, gifts or other services                             | __X__ None                     |                                                                       |
|    |                                                                                                              |                                |                                                                       |
|    |                                                                                                              |                                |                                                                       |
| 13 | Other financial or non-financial interests                                                                   | __X__ None                     |                                                                       |
|    |                                                                                                              |                                |                                                                       |
|    |                                                                                                              |                                |                                                                       |

Please place an "X" next to the following statement to indicate your agreement:

X\_\_\_ I certify that I have answered every question and have not altered the wording of any of the questions on this form.

# ICMJE DISCLOSURE FORM

Date: 8/30/21

Your Name: Ghassan K Abou-Alfa

Manuscript Title: Multicenter randomized phase 2 trial of atezolizumab with or without cobimetinib in biliary tract cancers (BTCs)

Manuscript number (if known): 152670-JCI-CMED-1

In the interest of transparency, we ask you to disclose all relationships/activities/interests listed below that are related to the content of your manuscript. "Related" means any relation with for-profit or not-for-profit third parties whose interests may be affected by the content of the manuscript. Disclosure represents a commitment to transparency and does not necessarily indicate a bias. If you are in doubt about whether to list a relationship/activity/interest, it is preferable that you do so.

The following questions apply to the author's relationships/activities/interests as they relate to the current manuscript only.

The author's relationships/activities/interests should be defined broadly. For example, if your manuscript pertains to the epidemiology of hypertension, you should declare all relationships with manufacturers of antihypertensive medication, even if that medication is not mentioned in the manuscript.

In item #1 below, report all support for the work reported in this manuscript without time limit. For all other items, the time frame for disclosure is the past 36 months.

|                                                           |                                                                                                                                                                                | Name all entities with whom you have this relationship or indicate none (add rows as needed)                                              | Specifications/Comments (e.g., if payments were made to you or to your institution) |
|-----------------------------------------------------------|--------------------------------------------------------------------------------------------------------------------------------------------------------------------------------|-------------------------------------------------------------------------------------------------------------------------------------------|-------------------------------------------------------------------------------------|
| <b>Time frame: Since the initial planning of the work</b> |                                                                                                                                                                                |                                                                                                                                           |                                                                                     |
| 1                                                         | All support for the present manuscript (e.g., funding, provision of study materials, medical writing, article processing charges, etc.)<br><b>No time limit for this item.</b> | <u>None</u>                                                                                                                               |                                                                                     |
|                                                           |                                                                                                                                                                                |                                                                                                                                           |                                                                                     |
|                                                           |                                                                                                                                                                                |                                                                                                                                           |                                                                                     |
|                                                           |                                                                                                                                                                                |                                                                                                                                           |                                                                                     |
|                                                           |                                                                                                                                                                                |                                                                                                                                           |                                                                                     |
|                                                           |                                                                                                                                                                                |                                                                                                                                           |                                                                                     |
|                                                           |                                                                                                                                                                                |                                                                                                                                           |                                                                                     |
| <b>Time frame: past 36 months</b>                         |                                                                                                                                                                                |                                                                                                                                           |                                                                                     |
| 2                                                         | Grants or contracts from any entity (if not indicated in item #1 above).                                                                                                       | Arcus, Agios, Astra Zeneca, BioNtech, BMS, Celgene, Flatiron, Genentech/Roche, Genoscience, Incyte, Polaris, Puma, QED, Silenseed, Yiviva |                                                                                     |
|                                                           |                                                                                                                                                                                |                                                                                                                                           |                                                                                     |

|    |                                                                                                              |                                                                                                                                                                                                                                                                                                                        |  |
|----|--------------------------------------------------------------------------------------------------------------|------------------------------------------------------------------------------------------------------------------------------------------------------------------------------------------------------------------------------------------------------------------------------------------------------------------------|--|
|    |                                                                                                              |                                                                                                                                                                                                                                                                                                                        |  |
| 3  | Royalties or licenses                                                                                        | _____ None                                                                                                                                                                                                                                                                                                             |  |
|    |                                                                                                              |                                                                                                                                                                                                                                                                                                                        |  |
|    |                                                                                                              |                                                                                                                                                                                                                                                                                                                        |  |
| 4  | Consulting fees                                                                                              | Adicet, Alnylam, Astra Zeneca, Autem, Bayer, Beigene, Berry Genomics, Celgene, Cend, CytomX, Eisai, Eli Lilly, Exelixis, Flatiron, Genentech/Roche, Genoscience, Helio, Incyte, Ipsen, Legend Biotech, Merck, Nerviano, QED, Redhill, Rafael, Servier, Silenseed, Sobi, Surface Oncology, Therabionics, Vector, Yiviva |  |
|    |                                                                                                              |                                                                                                                                                                                                                                                                                                                        |  |
|    |                                                                                                              |                                                                                                                                                                                                                                                                                                                        |  |
| 5  | Payment or honoraria for lectures, presentations, speakers bureaus, manuscript writing or educational events | _____ None                                                                                                                                                                                                                                                                                                             |  |
|    |                                                                                                              |                                                                                                                                                                                                                                                                                                                        |  |
|    |                                                                                                              |                                                                                                                                                                                                                                                                                                                        |  |
| 6  | Payment for expert testimony                                                                                 | _____ None                                                                                                                                                                                                                                                                                                             |  |
|    |                                                                                                              |                                                                                                                                                                                                                                                                                                                        |  |
|    |                                                                                                              |                                                                                                                                                                                                                                                                                                                        |  |
| 7  | Support for attending meetings and/or travel                                                                 | _____ None                                                                                                                                                                                                                                                                                                             |  |
|    |                                                                                                              |                                                                                                                                                                                                                                                                                                                        |  |
|    |                                                                                                              |                                                                                                                                                                                                                                                                                                                        |  |
| 8  | Patents planned, issued or pending                                                                           | _____ None                                                                                                                                                                                                                                                                                                             |  |
|    |                                                                                                              |                                                                                                                                                                                                                                                                                                                        |  |
|    |                                                                                                              |                                                                                                                                                                                                                                                                                                                        |  |
| 9  | Participation on a Data Safety Monitoring Board or Advisory Board                                            | _____ None                                                                                                                                                                                                                                                                                                             |  |
|    |                                                                                                              |                                                                                                                                                                                                                                                                                                                        |  |
|    |                                                                                                              |                                                                                                                                                                                                                                                                                                                        |  |
| 10 | Leadership or fiduciary role in other board, society, committee or advocacy group, paid or unpaid            | _____ None                                                                                                                                                                                                                                                                                                             |  |
|    |                                                                                                              |                                                                                                                                                                                                                                                                                                                        |  |
|    |                                                                                                              |                                                                                                                                                                                                                                                                                                                        |  |
| 11 | Stock or stock options                                                                                       | _____ None                                                                                                                                                                                                                                                                                                             |  |

|    |                                                                                  |            |  |
|----|----------------------------------------------------------------------------------|------------|--|
|    |                                                                                  |            |  |
|    |                                                                                  |            |  |
| 12 | Receipt of equipment, materials, drugs, medical writing, gifts or other services | _____ None |  |
|    |                                                                                  |            |  |
|    |                                                                                  |            |  |
| 13 | Other financial or non-financial interests                                       | _____ None |  |
|    |                                                                                  |            |  |
|    |                                                                                  |            |  |

Please place an "X" next to the following statement to indicate your agreement:

  X   I certify that I have answered every question and have not altered the wording of any of the questions on this form.

# ICMJE DISCLOSURE FORM

Date: 8/30/2021

Your Name: Elad Sharon

Manuscript Title: Multicenter randomized phase 2 trial of atezolizumab with or without cobimetinib in biliary tract cancers (BTCs)

Manuscript number (if known): 152670-JCI-CMED-1

In the interest of transparency, we ask you to disclose all relationships/activities/interests listed below that are related to the content of your manuscript. "Related" means any relation with for-profit or not-for-profit third parties whose interests may be affected by the content of the manuscript. Disclosure represents a commitment to transparency and does not necessarily indicate a bias. If you are in doubt about whether to list a relationship/activity/interest, it is preferable that you do so.

The following questions apply to the author's relationships/activities/interests as they relate to the current manuscript only.

The author's relationships/activities/interests should be defined broadly. For example, if your manuscript pertains to the epidemiology of hypertension, you should declare all relationships with manufacturers of antihypertensive medication, even if that medication is not mentioned in the manuscript.

In item #1 below, report all support for the work reported in this manuscript without time limit. For all other items, the time frame for disclosure is the past 36 months.

|                                                           |                                                                                                                                                                                | Name all entities with whom you have this relationship or indicate none (add rows as needed) | Specifications/Comments (e.g., if payments were made to you or to your institution) |
|-----------------------------------------------------------|--------------------------------------------------------------------------------------------------------------------------------------------------------------------------------|----------------------------------------------------------------------------------------------|-------------------------------------------------------------------------------------|
| <b>Time frame: Since the initial planning of the work</b> |                                                                                                                                                                                |                                                                                              |                                                                                     |
| 1                                                         | All support for the present manuscript (e.g., funding, provision of study materials, medical writing, article processing charges, etc.)<br><b>No time limit for this item.</b> | <input checked="" type="checkbox"/> None                                                     |                                                                                     |
|                                                           |                                                                                                                                                                                |                                                                                              |                                                                                     |
|                                                           |                                                                                                                                                                                |                                                                                              |                                                                                     |
|                                                           |                                                                                                                                                                                |                                                                                              |                                                                                     |
|                                                           |                                                                                                                                                                                |                                                                                              |                                                                                     |
|                                                           |                                                                                                                                                                                |                                                                                              |                                                                                     |
|                                                           |                                                                                                                                                                                |                                                                                              |                                                                                     |
| <b>Time frame: past 36 months</b>                         |                                                                                                                                                                                |                                                                                              |                                                                                     |
| 2                                                         | Grants or contracts from any entity (if not indicated in item #1 above).                                                                                                       | <input checked="" type="checkbox"/> None                                                     |                                                                                     |
|                                                           |                                                                                                                                                                                |                                                                                              |                                                                                     |
|                                                           |                                                                                                                                                                                |                                                                                              |                                                                                     |
| 3                                                         | Royalties or licenses                                                                                                                                                          | <input checked="" type="checkbox"/> None                                                     |                                                                                     |
|                                                           |                                                                                                                                                                                |                                                                                              |                                                                                     |

|    |                                                                                                              |                                          |  |
|----|--------------------------------------------------------------------------------------------------------------|------------------------------------------|--|
|    |                                                                                                              |                                          |  |
| 4  | Consulting fees                                                                                              | <input checked="" type="checkbox"/> None |  |
|    |                                                                                                              |                                          |  |
|    |                                                                                                              |                                          |  |
| 5  | Payment or honoraria for lectures, presentations, speakers bureaus, manuscript writing or educational events | <input checked="" type="checkbox"/> None |  |
|    |                                                                                                              |                                          |  |
|    |                                                                                                              |                                          |  |
| 6  | Payment for expert testimony                                                                                 | <input checked="" type="checkbox"/> None |  |
|    |                                                                                                              |                                          |  |
|    |                                                                                                              |                                          |  |
| 7  | Support for attending meetings and/or travel                                                                 | <input checked="" type="checkbox"/> None |  |
|    |                                                                                                              |                                          |  |
|    |                                                                                                              |                                          |  |
| 8  | Patents planned, issued or pending                                                                           | <input checked="" type="checkbox"/> None |  |
|    |                                                                                                              |                                          |  |
|    |                                                                                                              |                                          |  |
| 9  | Participation on a Data Safety Monitoring Board or Advisory Board                                            | <input checked="" type="checkbox"/> None |  |
|    |                                                                                                              |                                          |  |
|    |                                                                                                              |                                          |  |
| 10 | Leadership or fiduciary role in other board, society, committee or advocacy group, paid or unpaid            | <input checked="" type="checkbox"/> None |  |
|    |                                                                                                              |                                          |  |
|    |                                                                                                              |                                          |  |
| 11 | Stock or stock options                                                                                       | <input checked="" type="checkbox"/> None |  |
|    |                                                                                                              |                                          |  |
|    |                                                                                                              |                                          |  |
| 12 | Receipt of equipment, materials, drugs, medical writing, gifts or other services                             | <input checked="" type="checkbox"/> None |  |
|    |                                                                                                              |                                          |  |
|    |                                                                                                              |                                          |  |
| 13 | Other financial or non-financial interests                                                                   | <input checked="" type="checkbox"/> None |  |
|    |                                                                                                              |                                          |  |
|    |                                                                                                              |                                          |  |

Please place an "X" next to the following statement to indicate your agreement:

☒ I certify that I have answered every question and have not altered the wording of any of the questions on this form.



## ICMJE DISCLOSURE FORM

**Date:** 8/29/21

**Your Name:** Daneng Li

**Manuscript Title:** Multicenter randomized phase 2 trial of atezolizumab with or without cobimetinib in biliary tract cancers (BTCs)

**Manuscript number (if known):** 152670-JCI-CMED-1

In the interest of transparency, we ask you to disclose all relationships/activities/interests listed below that are related to the content of your manuscript. "Related" means any relation with for-profit or not-for-profit third parties whose interests may be affected by the content of the manuscript. Disclosure represents a commitment to transparency and does not necessarily indicate a bias. If you are in doubt about whether to list a relationship/activity/interest, it is preferable that you do so.

The following questions apply to the author's relationships/activities/interests as they relate to the current manuscript only.

The author's relationships/activities/interests should be defined broadly. For example, if your manuscript pertains to the epidemiology of hypertension, you should declare all relationships with manufacturers of antihypertensive medication, even if that medication is not mentioned in the manuscript.

In item #1 below, report all support for the work reported in this manuscript without time limit. For all other items, the time frame for disclosure is the past 36 months.

|                                                           |                                                                                                                                                                                | Name all entities with whom you have this relationship or indicate none (add rows as needed) | Specifications/Comments (e.g., if payments were made to you or to your institution) |
|-----------------------------------------------------------|--------------------------------------------------------------------------------------------------------------------------------------------------------------------------------|----------------------------------------------------------------------------------------------|-------------------------------------------------------------------------------------|
| <b>Time frame: Since the initial planning of the work</b> |                                                                                                                                                                                |                                                                                              |                                                                                     |
| 1                                                         | All support for the present manuscript (e.g., funding, provision of study materials, medical writing, article processing charges, etc.)<br><b>No time limit for this item.</b> | None                                                                                         |                                                                                     |
|                                                           |                                                                                                                                                                                |                                                                                              |                                                                                     |
|                                                           |                                                                                                                                                                                |                                                                                              |                                                                                     |
|                                                           |                                                                                                                                                                                |                                                                                              |                                                                                     |
|                                                           |                                                                                                                                                                                |                                                                                              |                                                                                     |
|                                                           |                                                                                                                                                                                |                                                                                              |                                                                                     |
|                                                           |                                                                                                                                                                                |                                                                                              |                                                                                     |
| <b>Time frame: past 36 months</b>                         |                                                                                                                                                                                |                                                                                              |                                                                                     |
| 2                                                         | Grants or contracts from any entity (if not indicated in item #1 above).                                                                                                       | Brooklyn Immunotherapeutics                                                                  | institution                                                                         |
|                                                           |                                                                                                                                                                                | AstraZeneca                                                                                  | institution                                                                         |
|                                                           |                                                                                                                                                                                |                                                                                              |                                                                                     |
| 3                                                         | Royalties or licenses                                                                                                                                                          | None                                                                                         |                                                                                     |
|                                                           |                                                                                                                                                                                |                                                                                              |                                                                                     |
|                                                           |                                                                                                                                                                                |                                                                                              |                                                                                     |
| 4                                                         | Consulting fees                                                                                                                                                                | QED                                                                                          | Self                                                                                |

|    |                                                                                                              |                                   |      |
|----|--------------------------------------------------------------------------------------------------------------|-----------------------------------|------|
|    |                                                                                                              | Merck                             | Self |
|    |                                                                                                              | Bayer                             | Self |
|    |                                                                                                              | Genentech                         | Self |
|    |                                                                                                              | Taiho                             | Self |
| 5  | Payment or honoraria for lectures, presentations, speakers bureaus, manuscript writing or educational events | Lexicon                           | Self |
|    |                                                                                                              | Ipsen                             | Self |
|    |                                                                                                              | Eisai                             | Self |
|    |                                                                                                              | Exelixis                          | Self |
|    |                                                                                                              | Advanced Accelerator Applications | Self |
|    |                                                                                                              | TerSera                           | Self |
|    |                                                                                                              | Coherus                           | Self |
|    |                                                                                                              | Sun Pharma                        | Self |
| 6  | Payment for expert testimony                                                                                 | None                              |      |
|    |                                                                                                              |                                   |      |
|    |                                                                                                              |                                   |      |
| 7  | Support for attending meetings and/or travel                                                                 | None                              |      |
|    |                                                                                                              |                                   |      |
|    |                                                                                                              |                                   |      |
| 8  | Patents planned, issued or pending                                                                           | None                              |      |
|    |                                                                                                              |                                   |      |
|    |                                                                                                              |                                   |      |
| 9  | Participation on a Data Safety Monitoring Board or Advisory Board                                            | None                              |      |
|    |                                                                                                              |                                   |      |
|    |                                                                                                              |                                   |      |
| 10 | Leadership or fiduciary role in other board, society, committee or advocacy group, paid or unpaid            | None                              |      |
|    |                                                                                                              |                                   |      |
|    |                                                                                                              |                                   |      |
| 11 | Stock or stock options                                                                                       | None                              |      |
|    |                                                                                                              |                                   |      |
|    |                                                                                                              |                                   |      |
| 12 | Receipt of equipment, materials, drugs, medical writing, gifts or other services                             | None                              |      |
|    |                                                                                                              |                                   |      |
|    |                                                                                                              |                                   |      |
| 13 | Other financial or non-financial interests                                                                   | None                              |      |
|    |                                                                                                              |                                   |      |
|    |                                                                                                              |                                   |      |

Please summarize the above conflict of interest in the following box:

Dr. Li reports grants from Brooklyn Immunotherapeutics and AstraZeneca to his institution as well as personal fees from Lexicon, Ipsen, Eisai, Exelixis, Advanced Accelerator Applications, Bayer, Genentech, Taiho, Coherus, Sun Pharma, TerSera, Merck, and QED, all outside the submitted work.

Please place an "X" next to the following statement to indicate your agreement:

☒ X\_ I certify that I have answered every question and have not altered the wording of any of the questions on this form.

# ICMJE DISCLOSURE FORM

**Date:** August 31, 2021

**Your Name:** Autumn J. McRee

**Manuscript Title:** Multicenter randomized phase 2 trial of atezolizumab with or without cobimetinib in biliary tract cancers (BTCs)

**Manuscript number (if known):** 152670-JCI-CMED-1

In the interest of transparency, we ask you to disclose all relationships/activities/interests listed below that are related to the content of your manuscript. "Related" means any relation with for-profit or not-for-profit third parties whose interests may be affected by the content of the manuscript. Disclosure represents a commitment to transparency and does not necessarily indicate a bias. If you are in doubt about whether to list a relationship/activity/interest, it is preferable that you do so.

The following questions apply to the author's relationships/activities/interests as they relate to the current manuscript only.

The author's relationships/activities/interests should be defined broadly. For example, if your manuscript pertains to the epidemiology of hypertension, you should declare all relationships with manufacturers of antihypertensive medication, even if that medication is not mentioned in the manuscript.

In item #1 below, report all support for the work reported in this manuscript without time limit. For all other items, the time frame for disclosure is the past 36 months.

|                                                           |                                                                                                                                                                                | Name all entities with whom you have this relationship or indicate none (add rows as needed) | Specifications/Comments (e.g., if payments were made to you or to your institution) |
|-----------------------------------------------------------|--------------------------------------------------------------------------------------------------------------------------------------------------------------------------------|----------------------------------------------------------------------------------------------|-------------------------------------------------------------------------------------|
| <b>Time frame: Since the initial planning of the work</b> |                                                                                                                                                                                |                                                                                              |                                                                                     |
| 1                                                         | All support for the present manuscript (e.g., funding, provision of study materials, medical writing, article processing charges, etc.)<br><b>No time limit for this item.</b> | __X__ None                                                                                   |                                                                                     |
|                                                           |                                                                                                                                                                                |                                                                                              |                                                                                     |
|                                                           |                                                                                                                                                                                |                                                                                              |                                                                                     |
|                                                           |                                                                                                                                                                                |                                                                                              |                                                                                     |
|                                                           |                                                                                                                                                                                |                                                                                              |                                                                                     |
|                                                           |                                                                                                                                                                                |                                                                                              |                                                                                     |
|                                                           |                                                                                                                                                                                |                                                                                              |                                                                                     |
| <b>Time frame: past 36 months</b>                         |                                                                                                                                                                                |                                                                                              |                                                                                     |
| 2                                                         | Grants or contracts from any entity (if not indicated in item #1 above).                                                                                                       | __X__ None                                                                                   |                                                                                     |
|                                                           |                                                                                                                                                                                |                                                                                              |                                                                                     |
|                                                           |                                                                                                                                                                                |                                                                                              |                                                                                     |
| 3                                                         | Royalties or licenses                                                                                                                                                          | __X__ None                                                                                   |                                                                                     |
|                                                           |                                                                                                                                                                                |                                                                                              |                                                                                     |

|    |                                                                                                              |                                          |  |
|----|--------------------------------------------------------------------------------------------------------------|------------------------------------------|--|
|    |                                                                                                              |                                          |  |
| 4  | Consulting fees                                                                                              | <input checked="" type="checkbox"/> None |  |
|    |                                                                                                              |                                          |  |
|    |                                                                                                              |                                          |  |
| 5  | Payment or honoraria for lectures, presentations, speakers bureaus, manuscript writing or educational events | <input checked="" type="checkbox"/> None |  |
|    |                                                                                                              |                                          |  |
|    |                                                                                                              |                                          |  |
| 6  | Payment for expert testimony                                                                                 | <input checked="" type="checkbox"/> None |  |
|    |                                                                                                              |                                          |  |
|    |                                                                                                              |                                          |  |
| 7  | Support for attending meetings and/or travel                                                                 | <input checked="" type="checkbox"/> None |  |
|    |                                                                                                              |                                          |  |
|    |                                                                                                              |                                          |  |
| 8  | Patents planned, issued or pending                                                                           | <input checked="" type="checkbox"/> None |  |
|    |                                                                                                              |                                          |  |
|    |                                                                                                              |                                          |  |
| 9  | Participation on a Data Safety Monitoring Board or Advisory Board                                            | <input checked="" type="checkbox"/> None |  |
|    |                                                                                                              |                                          |  |
|    |                                                                                                              |                                          |  |
| 10 | Leadership or fiduciary role in other board, society, committee or advocacy group, paid or unpaid            | <input checked="" type="checkbox"/> None |  |
|    |                                                                                                              |                                          |  |
|    |                                                                                                              |                                          |  |
| 11 | Stock or stock options                                                                                       | <input checked="" type="checkbox"/> None |  |
|    |                                                                                                              |                                          |  |
|    |                                                                                                              |                                          |  |
| 12 | Receipt of equipment, materials, drugs, medical writing, gifts or other services                             | <input checked="" type="checkbox"/> None |  |
|    |                                                                                                              |                                          |  |
|    |                                                                                                              |                                          |  |
| 13 | Other financial or non-financial interests                                                                   | <input checked="" type="checkbox"/> None |  |
|    |                                                                                                              |                                          |  |
|    |                                                                                                              |                                          |  |

Please place an "X" next to the following statement to indicate your agreement:

☒ I certify that I have answered every question and have not altered the wording of any of the questions on this form.

# ICMJE DISCLOSURE FORM

Date: 8/30/2021

Your Name: Anne Noonan

Manuscript Title: Multicenter randomized phase 2 trial of atezolizumab with or without cobimetinib in biliary tract cancers (BTCs)

Manuscript number (if known): 152670-JCI-CMED-1

In the interest of transparency, we ask you to disclose all relationships/activities/interests listed below that are related to the content of your manuscript. "Related" means any relation with for-profit or not-for-profit third parties whose interests may be affected by the content of the manuscript. Disclosure represents a commitment to transparency and does not necessarily indicate a bias. If you are in doubt about whether to list a relationship/activity/interest, it is preferable that you do so.

The following questions apply to the author's relationships/activities/interests as they relate to the current manuscript only.

The author's relationships/activities/interests should be defined broadly. For example, if your manuscript pertains to the epidemiology of hypertension, you should declare all relationships with manufacturers of antihypertensive medication, even if that medication is not mentioned in the manuscript.

In item #1 below, report all support for the work reported in this manuscript without time limit. For all other items, the time frame for disclosure is the past 36 months.

|                                                           |                                                                                                                                                                                | Name all entities with whom you have this relationship or indicate none (add rows as needed) | Specifications/Comments (e.g., if payments were made to you or to your institution) |
|-----------------------------------------------------------|--------------------------------------------------------------------------------------------------------------------------------------------------------------------------------|----------------------------------------------------------------------------------------------|-------------------------------------------------------------------------------------|
| <b>Time frame: Since the initial planning of the work</b> |                                                                                                                                                                                |                                                                                              |                                                                                     |
| 1                                                         | All support for the present manuscript (e.g., funding, provision of study materials, medical writing, article processing charges, etc.)<br><b>No time limit for this item.</b> | <input checked="" type="checkbox"/> None                                                     |                                                                                     |
|                                                           |                                                                                                                                                                                |                                                                                              |                                                                                     |
|                                                           |                                                                                                                                                                                |                                                                                              |                                                                                     |
|                                                           |                                                                                                                                                                                |                                                                                              |                                                                                     |
|                                                           |                                                                                                                                                                                |                                                                                              |                                                                                     |
|                                                           |                                                                                                                                                                                |                                                                                              |                                                                                     |
|                                                           |                                                                                                                                                                                |                                                                                              |                                                                                     |
| <b>Time frame: past 36 months</b>                         |                                                                                                                                                                                |                                                                                              |                                                                                     |
| 2                                                         | Grants or contracts from any entity (if not indicated in item #1 above).                                                                                                       | <input type="checkbox"/> None                                                                |                                                                                     |
|                                                           |                                                                                                                                                                                |                                                                                              |                                                                                     |
|                                                           |                                                                                                                                                                                |                                                                                              |                                                                                     |
| 3                                                         | Royalties or licenses                                                                                                                                                          | <input type="checkbox"/> None                                                                |                                                                                     |
|                                                           |                                                                                                                                                                                |                                                                                              |                                                                                     |

|    |                                                                                                              |                                  |  |
|----|--------------------------------------------------------------------------------------------------------------|----------------------------------|--|
|    |                                                                                                              |                                  |  |
| 4  | Consulting fees                                                                                              | <input type="checkbox"/> x_ None |  |
|    |                                                                                                              |                                  |  |
|    |                                                                                                              |                                  |  |
| 5  | Payment or honoraria for lectures, presentations, speakers bureaus, manuscript writing or educational events | <input type="checkbox"/> x_ None |  |
|    |                                                                                                              |                                  |  |
|    |                                                                                                              |                                  |  |
| 6  | Payment for expert testimony                                                                                 | <input type="checkbox"/> x_ None |  |
|    |                                                                                                              |                                  |  |
|    |                                                                                                              |                                  |  |
| 7  | Support for attending meetings and/or travel                                                                 | <input type="checkbox"/> x_ None |  |
|    |                                                                                                              |                                  |  |
|    |                                                                                                              |                                  |  |
| 8  | Patents planned, issued or pending                                                                           | <input type="checkbox"/> x_ None |  |
|    |                                                                                                              |                                  |  |
|    |                                                                                                              |                                  |  |
| 9  | Participation on a Data Safety Monitoring Board or Advisory Board                                            | <input type="checkbox"/> x_ None |  |
|    |                                                                                                              |                                  |  |
|    |                                                                                                              |                                  |  |
| 10 | Leadership or fiduciary role in other board, society, committee or advocacy group, paid or unpaid            | <input type="checkbox"/> x_ None |  |
|    |                                                                                                              |                                  |  |
|    |                                                                                                              |                                  |  |
| 11 | Stock or stock options                                                                                       | <input type="checkbox"/> x_ None |  |
|    |                                                                                                              |                                  |  |
|    |                                                                                                              |                                  |  |
| 12 | Receipt of equipment, materials, drugs, medical writing, gifts or other services                             | <input type="checkbox"/> x_ None |  |
|    |                                                                                                              |                                  |  |
|    |                                                                                                              |                                  |  |
| 13 | Other financial or non-financial interests                                                                   | <input type="checkbox"/> x_ None |  |
|    |                                                                                                              |                                  |  |
|    |                                                                                                              |                                  |  |

Please place an "X" next to the following statement to indicate your agreement:

☐x\_ I certify that I have answered every question and have not altered the wording of any of the questions on this form.

# ICMJE DISCLOSURE FORM

Date: 8-30-2021

Your Name: Andrew Poklepovic

Manuscript Title: Multicenter randomized phase 2 trial of atezolizumab with or without cobimetinib in biliary tract cancers (BTCs)

Manuscript number (if known): 152670-JCI-CMED-1

In the interest of transparency, we ask you to disclose all relationships/activities/interests listed below that are related to the content of your manuscript. "Related" means any relation with for-profit or not-for-profit third parties whose interests may be affected by the content of the manuscript. Disclosure represents a commitment to transparency and does not necessarily indicate a bias. If you are in doubt about whether to list a relationship/activity/interest, it is preferable that you do so.

The following questions apply to the author's relationships/activities/interests as they relate to the current manuscript only.

The author's relationships/activities/interests should be defined broadly. For example, if your manuscript pertains to the epidemiology of hypertension, you should declare all relationships with manufacturers of antihypertensive medication, even if that medication is not mentioned in the manuscript.

In item #1 below, report all support for the work reported in this manuscript without time limit. For all other items, the time frame for disclosure is the past 36 months.

|                                                           |                                                                                                                                                                                | Name all entities with whom you have this relationship or indicate none (add rows as needed) | Specifications/Comments (e.g., if payments were made to you or to your institution) |
|-----------------------------------------------------------|--------------------------------------------------------------------------------------------------------------------------------------------------------------------------------|----------------------------------------------------------------------------------------------|-------------------------------------------------------------------------------------|
| <b>Time frame: Since the initial planning of the work</b> |                                                                                                                                                                                |                                                                                              |                                                                                     |
| 1                                                         | All support for the present manuscript (e.g., funding, provision of study materials, medical writing, article processing charges, etc.)<br><b>No time limit for this item.</b> | <input checked="" type="checkbox"/> None                                                     |                                                                                     |
|                                                           |                                                                                                                                                                                |                                                                                              |                                                                                     |
|                                                           |                                                                                                                                                                                |                                                                                              |                                                                                     |
|                                                           |                                                                                                                                                                                |                                                                                              |                                                                                     |
|                                                           |                                                                                                                                                                                |                                                                                              |                                                                                     |
|                                                           |                                                                                                                                                                                |                                                                                              |                                                                                     |
|                                                           |                                                                                                                                                                                |                                                                                              |                                                                                     |
| <b>Time frame: past 36 months</b>                         |                                                                                                                                                                                |                                                                                              |                                                                                     |
| 2                                                         | Grants or contracts from any entity (if not indicated in item #1 above).                                                                                                       | <input checked="" type="checkbox"/> None                                                     |                                                                                     |
|                                                           |                                                                                                                                                                                |                                                                                              |                                                                                     |
|                                                           |                                                                                                                                                                                |                                                                                              |                                                                                     |
| 3                                                         | Royalties or licenses                                                                                                                                                          | <input type="checkbox"/> None                                                                |                                                                                     |



|    |                                                                                                              |                                                       |                                   |
|----|--------------------------------------------------------------------------------------------------------------|-------------------------------------------------------|-----------------------------------|
|    |                                                                                                              |                                                       |                                   |
| 4  | Consulting fees                                                                                              | <input checked="" type="checkbox"/> None              |                                   |
|    |                                                                                                              |                                                       |                                   |
|    |                                                                                                              |                                                       |                                   |
| 5  | Payment or honoraria for lectures, presentations, speakers bureaus, manuscript writing or educational events | <input type="checkbox"/> None<br>Bristol Myers Squibb | Speakers Bureau for immunotherapy |
|    |                                                                                                              |                                                       |                                   |
|    |                                                                                                              |                                                       |                                   |
| 6  | Payment for expert testimony                                                                                 | <input checked="" type="checkbox"/> None              |                                   |
|    |                                                                                                              |                                                       |                                   |
|    |                                                                                                              |                                                       |                                   |
| 7  | Support for attending meetings and/or travel                                                                 | <input checked="" type="checkbox"/> None              |                                   |
|    |                                                                                                              |                                                       |                                   |
|    |                                                                                                              |                                                       |                                   |
| 8  | Patents planned, issued or pending                                                                           | <input checked="" type="checkbox"/> None              |                                   |
|    |                                                                                                              |                                                       |                                   |
|    |                                                                                                              |                                                       |                                   |
| 9  | Participation on a Data Safety Monitoring Board or Advisory Board                                            | <input checked="" type="checkbox"/> None              |                                   |
|    |                                                                                                              |                                                       |                                   |
|    |                                                                                                              |                                                       |                                   |
| 10 | Leadership or fiduciary role in other board, society, committee or advocacy group, paid or unpaid            | <input checked="" type="checkbox"/> None              |                                   |
|    |                                                                                                              |                                                       |                                   |
|    |                                                                                                              |                                                       |                                   |
| 11 | Stock or stock options                                                                                       | <input checked="" type="checkbox"/> None              |                                   |
|    |                                                                                                              |                                                       |                                   |
|    |                                                                                                              |                                                       |                                   |
| 12 | Receipt of equipment, materials, drugs, medical writing, gifts or other services                             | <input type="checkbox"/> None                         |                                   |
|    |                                                                                                              |                                                       |                                   |
|    |                                                                                                              |                                                       |                                   |
| 13 | Other financial or non-financial interests                                                                   | <input type="checkbox"/> None                         |                                   |
|    |                                                                                                              |                                                       |                                   |
|    |                                                                                                              |                                                       |                                   |

Please place an "X" next to the following statement to indicate your agreement:

☒ I certify that I have answered every question and have not altered the wording of any of the questions on this form.



# ICMJE DISCLOSURE FORM

Date: 8/30/2021

Your Name: Andrea Wang-Gillam

Manuscript Title: Multicenter randomized phase 2 trial of atezolizumab with or without cobimetinib in biliary tract cancers (BTCs)

Manuscript number (if known): 152670-JCI-CMED-1

In the interest of transparency, we ask you to disclose all relationships/activities/interests listed below that are related to the content of your manuscript. "Related" means any relation with for-profit or not-for-profit third parties whose interests may be affected by the content of the manuscript. Disclosure represents a commitment to transparency and does not necessarily indicate a bias. If you are in doubt about whether to list a relationship/activity/interest, it is preferable that you do so.

The following questions apply to the author's relationships/activities/interests as they relate to the current manuscript only.

The author's relationships/activities/interests should be defined broadly. For example, if your manuscript pertains to the epidemiology of hypertension, you should declare all relationships with manufacturers of antihypertensive medication, even if that medication is not mentioned in the manuscript.

In item #1 below, report all support for the work reported in this manuscript without time limit. For all other items, the time frame for disclosure is the past 36 months.

|                                                           |                                                                                                                                                                                | Name all entities with whom you have this relationship or indicate none (add rows as needed) | Specifications/Comments (e.g., if payments were made to you or to your institution) |
|-----------------------------------------------------------|--------------------------------------------------------------------------------------------------------------------------------------------------------------------------------|----------------------------------------------------------------------------------------------|-------------------------------------------------------------------------------------|
| <b>Time frame: Since the initial planning of the work</b> |                                                                                                                                                                                |                                                                                              |                                                                                     |
| 1                                                         | All support for the present manuscript (e.g., funding, provision of study materials, medical writing, article processing charges, etc.)<br><b>No time limit for this item.</b> | <input checked="" type="checkbox"/> None                                                     |                                                                                     |
|                                                           |                                                                                                                                                                                |                                                                                              |                                                                                     |
|                                                           |                                                                                                                                                                                |                                                                                              |                                                                                     |
|                                                           |                                                                                                                                                                                |                                                                                              |                                                                                     |
|                                                           |                                                                                                                                                                                |                                                                                              |                                                                                     |
|                                                           |                                                                                                                                                                                |                                                                                              |                                                                                     |
|                                                           |                                                                                                                                                                                |                                                                                              |                                                                                     |
| <b>Time frame: past 36 months</b>                         |                                                                                                                                                                                |                                                                                              |                                                                                     |
| 2                                                         | Grants or contracts from any entity (if not indicated in item #1 above).                                                                                                       | <input type="checkbox"/> None                                                                |                                                                                     |
|                                                           |                                                                                                                                                                                |                                                                                              |                                                                                     |
|                                                           |                                                                                                                                                                                |                                                                                              |                                                                                     |
| 3                                                         | Royalties or licenses                                                                                                                                                          | <input type="checkbox"/> None                                                                |                                                                                     |
|                                                           |                                                                                                                                                                                |                                                                                              |                                                                                     |

|    |                                                                                                              |                     |                  |
|----|--------------------------------------------------------------------------------------------------------------|---------------------|------------------|
|    |                                                                                                              |                     |                  |
| 4  | Consulting fees                                                                                              | ___ None<br>Merck   | Advisory meeting |
|    |                                                                                                              | Eisai               | Advisory meeting |
|    |                                                                                                              | AstraZeneca         | Advisory meeting |
|    |                                                                                                              | Inxmed              | Advisory meeting |
| 5  | Payment or honoraria for lectures, presentations, speakers bureaus, manuscript writing or educational events | ___ None<br>Bayer   | Lecture          |
|    |                                                                                                              |                     |                  |
|    |                                                                                                              |                     |                  |
| 6  | Payment for expert testimony                                                                                 | __x__ None          |                  |
|    |                                                                                                              |                     |                  |
|    |                                                                                                              |                     |                  |
| 7  | Support for attending meetings and/or travel                                                                 | __x__ None          |                  |
|    |                                                                                                              |                     |                  |
|    |                                                                                                              |                     |                  |
| 8  | Patents planned, issued or pending                                                                           | _x___ None          |                  |
|    |                                                                                                              |                     |                  |
|    |                                                                                                              |                     |                  |
| 9  | Participation on a Data Safety Monitoring Board or Advisory Board                                            | __x__ None          |                  |
|    |                                                                                                              |                     |                  |
|    |                                                                                                              |                     |                  |
| 10 | Leadership or fiduciary role in other board, society, committee or advocacy group, paid or unpaid            | ___ None            |                  |
|    |                                                                                                              |                     |                  |
|    |                                                                                                              |                     |                  |
| 11 | Stock or stock options                                                                                       | ___ None<br>Jacobio |                  |
|    |                                                                                                              |                     |                  |
|    |                                                                                                              |                     |                  |
| 12 | Receipt of equipment, materials, drugs, medical writing, gifts or other services                             | __x__ None          |                  |
|    |                                                                                                              |                     |                  |
|    |                                                                                                              |                     |                  |
| 13 | Other financial or non-financial interests                                                                   | ___ None            |                  |
|    |                                                                                                              |                     |                  |
|    |                                                                                                              |                     |                  |

Please place an "X" next to the following statement to indicate your agreement:

  X   I certify that I have answered every question and have not altered the wording of any of the questions on this form.



## ICMJE DISCLOSURE FORM

**Date:** 08/29/2021

**Your Name:** Amanda N. Ruggieri

**Manuscript Title:** Multicenter randomized phase 2 trial of atezolizumab with or without cobimetinib in biliary tract cancers (BTCs)

**Manuscript number (if known):** 152670-JCI-CMED-1

In the interest of transparency, we ask you to disclose all relationships/activities/interests listed below that are related to the content of your manuscript. "Related" means any relation with for-profit or not-for-profit third parties whose interests may be affected by the content of the manuscript. Disclosure represents a commitment to transparency and does not necessarily indicate a bias. If you are in doubt about whether to list a relationship/activity/interest, it is preferable that you do so.

The following questions apply to the author's relationships/activities/interests as they relate to the current manuscript only.

The author's relationships/activities/interests should be defined broadly. For example, if your manuscript pertains to the epidemiology of hypertension, you should declare all relationships with manufacturers of antihypertensive medication, even if that medication is not mentioned in the manuscript.

In item #1 below, report all support for the work reported in this manuscript without time limit. For all other items, the time frame for disclosure is the past 36 months.

|                                                           |                                                                                                                                                                                | Name all entities with whom you have this relationship or indicate none (add rows as needed) | Specifications/Comments (e.g., if payments were made to you or to your institution) |
|-----------------------------------------------------------|--------------------------------------------------------------------------------------------------------------------------------------------------------------------------------|----------------------------------------------------------------------------------------------|-------------------------------------------------------------------------------------|
| <b>Time frame: Since the initial planning of the work</b> |                                                                                                                                                                                |                                                                                              |                                                                                     |
| 1                                                         | All support for the present manuscript (e.g., funding, provision of study materials, medical writing, article processing charges, etc.)<br><b>No time limit for this item.</b> | <input checked="" type="checkbox"/> None                                                     |                                                                                     |
|                                                           |                                                                                                                                                                                |                                                                                              |                                                                                     |
|                                                           |                                                                                                                                                                                |                                                                                              |                                                                                     |
|                                                           |                                                                                                                                                                                |                                                                                              |                                                                                     |
|                                                           |                                                                                                                                                                                |                                                                                              |                                                                                     |
|                                                           |                                                                                                                                                                                |                                                                                              |                                                                                     |
|                                                           |                                                                                                                                                                                |                                                                                              |                                                                                     |
| <b>Time frame: past 36 months</b>                         |                                                                                                                                                                                |                                                                                              |                                                                                     |
| 2                                                         | Grants or contracts from any entity (if not indicated in item #1 above).                                                                                                       | <input checked="" type="checkbox"/> None                                                     |                                                                                     |
|                                                           |                                                                                                                                                                                |                                                                                              |                                                                                     |
|                                                           |                                                                                                                                                                                |                                                                                              |                                                                                     |
| 3                                                         | Royalties or licenses                                                                                                                                                          | <input checked="" type="checkbox"/> None                                                     |                                                                                     |
|                                                           |                                                                                                                                                                                |                                                                                              |                                                                                     |

|    |                                                                                                              |                                          |  |
|----|--------------------------------------------------------------------------------------------------------------|------------------------------------------|--|
|    |                                                                                                              |                                          |  |
| 4  | Consulting fees                                                                                              | <input checked="" type="checkbox"/> None |  |
|    |                                                                                                              |                                          |  |
|    |                                                                                                              |                                          |  |
| 5  | Payment or honoraria for lectures, presentations, speakers bureaus, manuscript writing or educational events | <input checked="" type="checkbox"/> None |  |
|    |                                                                                                              |                                          |  |
|    |                                                                                                              |                                          |  |
| 6  | Payment for expert testimony                                                                                 | <input checked="" type="checkbox"/> None |  |
|    |                                                                                                              |                                          |  |
|    |                                                                                                              |                                          |  |
| 7  | Support for attending meetings and/or travel                                                                 | <input checked="" type="checkbox"/> None |  |
|    |                                                                                                              |                                          |  |
|    |                                                                                                              |                                          |  |
| 8  | Patents planned, issued or pending                                                                           | <input checked="" type="checkbox"/> None |  |
|    |                                                                                                              |                                          |  |
|    |                                                                                                              |                                          |  |
| 9  | Participation on a Data Safety Monitoring Board or Advisory Board                                            | <input checked="" type="checkbox"/> None |  |
|    |                                                                                                              |                                          |  |
|    |                                                                                                              |                                          |  |
| 10 | Leadership or fiduciary role in other board, society, committee or advocacy group, paid or unpaid            | <input checked="" type="checkbox"/> None |  |
|    |                                                                                                              |                                          |  |
|    |                                                                                                              |                                          |  |
| 11 | Stock or stock options                                                                                       | <input checked="" type="checkbox"/> None |  |
|    |                                                                                                              |                                          |  |
|    |                                                                                                              |                                          |  |
| 12 | Receipt of equipment, materials, drugs, medical writing, gifts or other services                             | <input checked="" type="checkbox"/> None |  |
|    |                                                                                                              |                                          |  |
|    |                                                                                                              |                                          |  |
| 13 | Other financial or non-financial interests                                                                   | <input checked="" type="checkbox"/> None |  |
|    |                                                                                                              |                                          |  |
|    |                                                                                                              |                                          |  |

Please place an "X" next to the following statement to indicate your agreement:

☒ I certify that I have answered every question and have not altered the wording of any of the questions on this form.

# ICMJE DISCLOSURE FORM

Date: Aug 30 2021  
 Your Name: Aditya Anand Mohan  
 Manuscript Title: Multicenter randomized phase 2 trial of atezolizumab with or without cobimetinib in biliary tract cancers (BTCs)  
 Manuscript number (if known): 152670-JCI-CMED-1

In the interest of transparency, we ask you to disclose all relationships/activities/interests listed below that are related to the content of your manuscript. "Related" means any relation with for-profit or not-for-profit third parties whose interests may be affected by the content of the manuscript. Disclosure represents a commitment to transparency and does not necessarily indicate a bias. If you are in doubt about whether to list a relationship/activity/interest, it is preferable that you do so.

The following questions apply to the author's relationships/activities/interests as they relate to the current manuscript only.

The author's relationships/activities/interests should be defined broadly. For example, if your manuscript pertains to the epidemiology of hypertension, you should declare all relationships with manufacturers of antihypertensive medication, even if that medication is not mentioned in the manuscript.

In item #1 below, report all support for the work reported in this manuscript without time limit. For all other items, the time frame for disclosure is the past 36 months.

|                                                           |                                                                                                                                                                                | Name all entities with whom you have this relationship or indicate none (add rows as needed) | Specifications/Comments (e.g., if payments were made to you or to your institution) |
|-----------------------------------------------------------|--------------------------------------------------------------------------------------------------------------------------------------------------------------------------------|----------------------------------------------------------------------------------------------|-------------------------------------------------------------------------------------|
| <b>Time frame: Since the initial planning of the work</b> |                                                                                                                                                                                |                                                                                              |                                                                                     |
| 1                                                         | All support for the present manuscript (e.g., funding, provision of study materials, medical writing, article processing charges, etc.)<br><b>No time limit for this item.</b> | <input checked="" type="checkbox"/> None                                                     |                                                                                     |
|                                                           |                                                                                                                                                                                |                                                                                              |                                                                                     |
|                                                           |                                                                                                                                                                                |                                                                                              |                                                                                     |
|                                                           |                                                                                                                                                                                |                                                                                              |                                                                                     |
|                                                           |                                                                                                                                                                                |                                                                                              |                                                                                     |
|                                                           |                                                                                                                                                                                |                                                                                              |                                                                                     |
|                                                           |                                                                                                                                                                                |                                                                                              |                                                                                     |
| <b>Time frame: past 36 months</b>                         |                                                                                                                                                                                |                                                                                              |                                                                                     |
| 2                                                         | Grants or contracts from any entity (if not indicated in item #1 above).                                                                                                       | <input type="checkbox"/> None                                                                |                                                                                     |
|                                                           |                                                                                                                                                                                |                                                                                              |                                                                                     |
|                                                           |                                                                                                                                                                                |                                                                                              |                                                                                     |
| 3                                                         | Royalties or licenses                                                                                                                                                          | <input type="checkbox"/> None                                                                |                                                                                     |
|                                                           |                                                                                                                                                                                |                                                                                              |                                                                                     |



|    |                                                                                                              |                               |  |
|----|--------------------------------------------------------------------------------------------------------------|-------------------------------|--|
|    |                                                                                                              |                               |  |
| 4  | Consulting fees                                                                                              | <input type="checkbox"/> None |  |
|    |                                                                                                              |                               |  |
|    |                                                                                                              |                               |  |
| 5  | Payment or honoraria for lectures, presentations, speakers bureaus, manuscript writing or educational events | <input type="checkbox"/> None |  |
|    |                                                                                                              |                               |  |
|    |                                                                                                              |                               |  |
| 6  | Payment for expert testimony                                                                                 | <input type="checkbox"/> None |  |
|    |                                                                                                              |                               |  |
|    |                                                                                                              |                               |  |
| 7  | Support for attending meetings and/or travel                                                                 | <input type="checkbox"/> None |  |
|    |                                                                                                              |                               |  |
|    |                                                                                                              |                               |  |
| 8  | Patents planned, issued or pending                                                                           | <input type="checkbox"/> None |  |
|    |                                                                                                              |                               |  |
|    |                                                                                                              |                               |  |
| 9  | Participation on a Data Safety Monitoring Board or Advisory Board                                            | <input type="checkbox"/> None |  |
|    |                                                                                                              |                               |  |
|    |                                                                                                              |                               |  |
| 10 | Leadership or fiduciary role in other board, society, committee or advocacy group, paid or unpaid            | <input type="checkbox"/> None |  |
|    |                                                                                                              |                               |  |
|    |                                                                                                              |                               |  |
| 11 | Stock or stock options                                                                                       | <input type="checkbox"/> None |  |
|    |                                                                                                              |                               |  |
|    |                                                                                                              |                               |  |
| 12 | Receipt of equipment, materials, drugs, medical writing, gifts or other services                             | <input type="checkbox"/> None |  |
|    |                                                                                                              |                               |  |
|    |                                                                                                              |                               |  |
| 13 | Other financial or non-financial interests                                                                   | <input type="checkbox"/> None |  |
|    |                                                                                                              |                               |  |
|    |                                                                                                              |                               |  |

Please place an "X" next to the following statement to indicate your agreement:

☒ I certify that I have answered every question and have not altered the wording of any of the questions on this form.

# ICMJE DISCLOSURE FORM

Date: 8/30/2021

Your Name: Yuan Liu

Manuscript Title: Multicenter randomized phase 2 trial of atezolizumab with or without cobimetinib in biliary tract cancers (BTCs)

Manuscript number (if known): 152670-JCI-CMED-1

In the interest of transparency, we ask you to disclose all relationships/activities/interests listed below that are related to the content of your manuscript. "Related" means any relation with for-profit or not-for-profit third parties whose interests may be affected by the content of the manuscript. Disclosure represents a commitment to transparency and does not necessarily indicate a bias. If you are in doubt about whether to list a relationship/activity/interest, it is preferable that you do so.

The following questions apply to the author's relationships/activities/interests as they relate to the current manuscript only.

The author's relationships/activities/interests should be defined broadly. For example, if your manuscript pertains to the epidemiology of hypertension, you should declare all relationships with manufacturers of antihypertensive medication, even if that medication is not mentioned in the manuscript.

In item #1 below, report all support for the work reported in this manuscript without time limit. For all other items, the time frame for disclosure is the past 36 months.

|                                                           |                                                                                                                                                                                | Name all entities with whom you have this relationship or indicate none (add rows as needed)                                                                                                | Specifications/Comments (e.g., if payments were made to you or to your institution) |
|-----------------------------------------------------------|--------------------------------------------------------------------------------------------------------------------------------------------------------------------------------|---------------------------------------------------------------------------------------------------------------------------------------------------------------------------------------------|-------------------------------------------------------------------------------------|
| <b>Time frame: Since the initial planning of the work</b> |                                                                                                                                                                                |                                                                                                                                                                                             |                                                                                     |
| 1                                                         | All support for the present manuscript (e.g., funding, provision of study materials, medical writing, article processing charges, etc.)<br><b>No time limit for this item.</b> | Research reported in this publication was supported in part by the Biostatistics Shared Resource of Winship Cancer Institute of Emory University and NIH/NCI under award number P30CA138292 | Payments were made to Winship Cancer Institute                                      |
|                                                           |                                                                                                                                                                                |                                                                                                                                                                                             |                                                                                     |
|                                                           |                                                                                                                                                                                |                                                                                                                                                                                             |                                                                                     |
|                                                           |                                                                                                                                                                                |                                                                                                                                                                                             |                                                                                     |
|                                                           |                                                                                                                                                                                |                                                                                                                                                                                             |                                                                                     |
|                                                           |                                                                                                                                                                                |                                                                                                                                                                                             |                                                                                     |
|                                                           |                                                                                                                                                                                |                                                                                                                                                                                             |                                                                                     |
| <b>Time frame: past 36 months</b>                         |                                                                                                                                                                                |                                                                                                                                                                                             |                                                                                     |
| 2                                                         |                                                                                                                                                                                | <u>      </u> None                                                                                                                                                                          |                                                                                     |

|    |                                                                                                              |           |  |
|----|--------------------------------------------------------------------------------------------------------------|-----------|--|
|    | Grants or contracts from any entity (if not indicated in item #1 above).                                     |           |  |
| 3  | Royalties or licenses                                                                                        | ____ None |  |
|    |                                                                                                              |           |  |
|    |                                                                                                              |           |  |
| 4  | Consulting fees                                                                                              | ____ None |  |
|    |                                                                                                              |           |  |
|    |                                                                                                              |           |  |
| 5  | Payment or honoraria for lectures, presentations, speakers bureaus, manuscript writing or educational events | ____ None |  |
|    |                                                                                                              |           |  |
|    |                                                                                                              |           |  |
| 6  | Payment for expert testimony                                                                                 | ____ None |  |
|    |                                                                                                              |           |  |
|    |                                                                                                              |           |  |
| 7  | Support for attending meetings and/or travel                                                                 | ____ None |  |
|    |                                                                                                              |           |  |
|    |                                                                                                              |           |  |
| 8  | Patents planned, issued or pending                                                                           | ____ None |  |
|    |                                                                                                              |           |  |
|    |                                                                                                              |           |  |
| 9  | Participation on a Data Safety Monitoring Board or Advisory Board                                            | ____ None |  |
|    |                                                                                                              |           |  |
|    |                                                                                                              |           |  |
| 10 | Leadership or fiduciary role in other board, society, committee or advocacy group, paid or unpaid            | ____ None |  |
|    |                                                                                                              |           |  |
|    |                                                                                                              |           |  |
| 11 | Stock or stock options                                                                                       | ____ None |  |
|    |                                                                                                              |           |  |
|    |                                                                                                              |           |  |
| 12 | Receipt of equipment, materials, drugs, medical writing, gifts or other services                             | ____ None |  |
|    |                                                                                                              |           |  |
|    |                                                                                                              |           |  |
| 13 | Other financial or non-financial interests                                                                   | ____ None |  |
|    |                                                                                                              |           |  |
|    |                                                                                                              |           |  |

Please place an "X" next to the following statement to indicate your agreement:

X I certify that I have answered every question and have not altered the wording of any of the questions on this form.
